# Supplementary material for: Plant growth-promoting rhizobacterium Bacillus megaterium modulates the expression of antioxidant-related and drought-responsive genes to protect rice (Oryza sativa L.) from drought
Source: Frontiers journal article supplement (doi:10.3389/fmicb.2024.1430546), 2024-08-21

Supplementary Figure S1

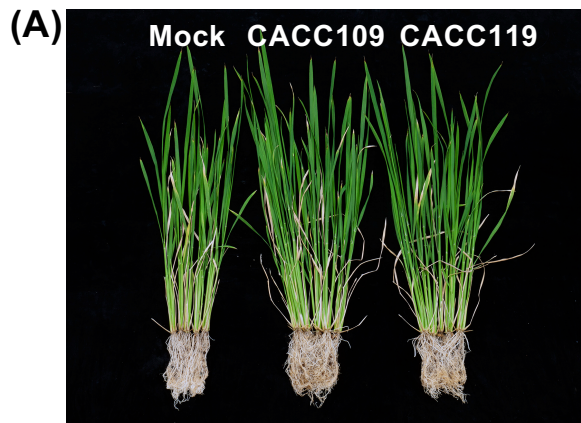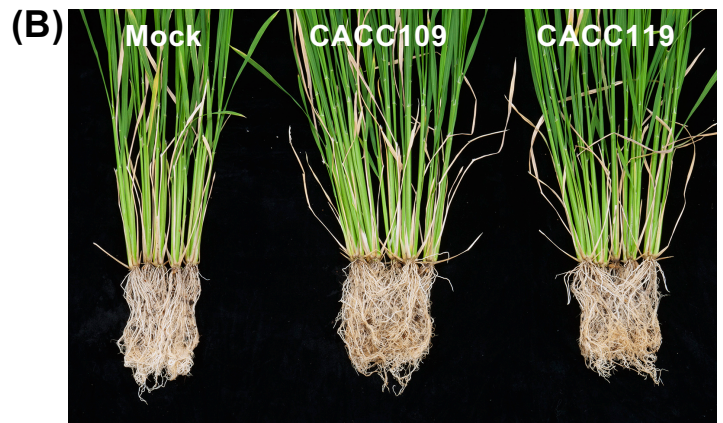

Supplement: Image_1.pdf [file Image_1.pdf]
