# Supplementary material for: Plant growth-promoting rhizobacterium Bacillus megaterium modulates the expression of antioxidant-related and drought-responsive genes to protect rice (Oryza sativa L.) from drought
Source: Front Microbiol. 2024 Aug 21;15:1430546. doi: 10.3389/fmicb.2024.1430546 (PMC11371581; doi:10.3389/fmicb.2024.1430546)
Supplement: Supplementary file 4 [file Table_1.xlsx]

## Sheet: Supplementary Table S1
	Supplementary Table S1. Sequences of gene-specific primers used in qRT-PCR.
	Gene	Sense primer (5'-3')	Antisense primer (5'-3')	Full name	Gene product	Function
	OsCAT	AAGGCCAGACAATGTCAGAT	GTGGCATTAATACGCCAGTA	Catalase	Catalase enzyme	Antioxidant enzyme that plays a key role in scavenging hydrogen peroxide
	OsSOD-Cu/Zn	GCTCTATTGCGTTGTATGCCA	GCTTGACTCCCAAATGGTGAC	Superoxide Dismutase, Cu/Zn	Cu/Zn Superoxide dismutase enzyme	Catalyze the dismutation of superoxide radicals into oxygen and hydrogen peroxide
	OsPOD	AACGCAACCACCAAGCCG	CCTCGATCATGCCCATCTTGA	Peroxidase	Peroxidase enzyme	Involved in the breakdown of peroxides
	OsAPX	AGTGTGAACCAGCAGACTAC	TCAAGACAGTAGCAGGGGAA	Ascorbate Peroxidase	Ascorbate peroxidase enzyme	Catalyzes the conversion of hydrogen peroxide to water using ascorbate as an electron donor
	OsGPX	AGCACCTACAAGGGGAAGGT	GAGTGCAAGCAAACTGGACA	Glutathione Peroxidase	Glutathione peroxidase enzyme	Reduces hydrogen peroxide and lipid hydroperoxides to water and lipid alcohols using glutathione
	OsP5CS1	TCTGCTCAGTGATGTGGATG	CCTACACGAGATTTGTCTCC	Pyrroline-5-Carboxylate Synthase 1	Pyrroline-5-carboxylate synthase enzyme	Involved in the biosynthesis of proline
	OsP5CS2	GTGGCTTGTGAAGGAGCTGT	TTTGACATGCTTTCGTGCTC	Pyrroline-5-Carboxylate Synthase 2	Pyrroline-5-carboxylate synthase enzyme	Involved in the biosynthesis of proline
	OsbZIP23	GGAGCAGCAAAAGAATGAGG	GGTCTTCAGCTTCACCATCC	Basic Leucine Zipper 23	Transcription factor bZIP23	Transcription factors involved in the regulation of gene expression in response to various stresses
	ONAC066	TGCATGCAAGAAGCTGAGGTCTG	TGCTGCTTCCTGTAGGTGATGC	NAC Domain-Containing Protein 66	NAC domain-containing transcription factor	Transcription factors involved in plant development and stress responses
	OsAREB1	TGGACCGACAGCAAAGAGAA	TAACTAGGCCTTTAGCTTCGATCAC	Abscisic Acid-Responsive Element-Binding Protein 1	AREB1 transcription factor	Mediate abscisic acid (ABA) signaling in response to abiotic stress
	OsAREB2	AAGAGACTTTGCTTGCGAAGAAC	TGATGAAGGTGGGAATTTGCA	Abscisic Acid-Responsive Element-Binding Protein 2	AREB2 transcription factor	Mediate abscisic acid (ABA) signaling in response to abiotic stress
	OsAREB8	TGAGGTGGCAAAACTGAAGGA	CTGTATCATTTCCACCTGCTTTTTC	Abscisic Acid-Responsive Element-Binding Protein 8	AREB8 transcription factor	Involved in ABA signaling and regulation of stress-responsive genes
	OsWRKY47	ATGGACGACCTGCTCGAGAT	GGCGATGTCCCATGTAGCAT	WRKY Transcription Factor 47	WRKY47 transcription factor	Involved in regulating plant responses to biotic and abiotic stresses
	OsDREB2A	GCTGCACATCAGCACCTTCA	TCCTGCACCTCAGGGACTAC	Dehydration-Responsive Element-Binding Protein 2A	DREB2A transcription factor	DREB proteins bind to dehydration-responsive elements in gene promoters and regulate expression of stress-inducible genes
	OsDREB2B1	TCCAGCCCGGAAGAAAATGT	GCTCCTGCTGATTGTTGAGC	Dehydration-Responsive Element-Binding Protein 2B1	DREB2B1 transcription factor	Involved in regulation of genes responsive to dehydration and other abiotic stresses
	OsDREB2B2	CAGCCCGGAAGAAAAAGCG	GCTCCTGCTGATTGTTGAGC	Dehydration-Responsive Element-Binding Protein 2B2	DREB2B2 transcription factor	Involved in regulation of genes responsive to dehydration and other abiotic stresses
	OsERD1	TCAAAGGGAAGACGAAGCATGG	GGGACGGAATACAACCATCTCA	Early Response to Dehydration 1	ERD1 protein	Encodes a protein involved in early response to dehydration stress
	OsActin1	ATCCTTGTATGCTAGCGGTCGA	ATCCAACCGGAGGATAGCATG	Actin 1	Actin1 protein	Essential components of the cytoskeleton, involved in cell shape, motility, and division
