# Supplementary material for: Plant growth-promoting rhizobacterium Bacillus megaterium modulates the expression of antioxidant-related and drought-responsive genes to protect rice (Oryza sativa L.) from drought
Source: Front Microbiol. 2024 Aug 21;15:1430546. doi: 10.3389/fmicb.2024.1430546 (PMC11371581; doi:10.3389/fmicb.2024.1430546)
Supplement: Supplementary file 5 [file Table_2.xlsx]

## Sheet: Supplementary Table S2
	Supplementary Table S2. Information on bacterial strains isolated from the soil and rhizosphere of ginseng, along with an evaluation of their growth under varying water potential conditions.
	No.	Accession Number	Strain	Origin	Bacterial growth under different water potentials (MPa)
					0	-0.15	-0.49
	1	CACC391	Brevibacterium frigoritolerans	Soil	100	67.8	34.1
	2	CACC392	Bacillus toyonensis	Soil	100	65.3	40.9
	3	CACC393	Bacillus aryabhattai	Soil	100	71.2	44.4
	4	CACC394	Bacillus toyonensis	Soil	100	79.1	37.4
	5	CACC395	Bacillus altitydinis	Soil	100	73.6	40.1
	6	CACC396	Bacillus mobilis	Soil	100	65.5	35.5
	7	CACC397	Bacillus albus	Soil	100	74.1	47
	8	CACC398	Baciilus stratosphericus	Soil	100	60.9	30.6
	9	CACC399	Bacillus toyonensis	Soil	100	78.6	30.2
	10	CACC400	Bacillus aryabhattai	Soil	100	75.3	40.4
	11	CACC401	Baciilus megaterium	Soil	100	80.4	48.8
	12	CACC402	Bacillus aryabhattai	Soil	100	59.6	45.5
	13	CACC403	Bacillus aryabhattai	Soil	100	74.5	49.3
	14	CACC404	Brevibacterium frigoritolerans	Soil	100	71.5	38.3
	15	CACC405	Bacillus altitydinis	Soil	100	55.4	41.1
	16	CACC406	Bacillus acidiceler	Soil	100	63	49.7
	17	CACC408	Bacillus aryabhattai	Soil	100	74	39.9
	18	CACC409	Bacillus aryabhattai	Soil	100	69	40.2
	19	CACC108	Bacillus megaterium	Ginseng rhizosphere	100	70.7	49.3
	20	CACC109	Bacillus megaterium	Ginseng rhizosphere	100	74.5	55.2
	21	CACC110	Bacillus megaterium	Ginseng rhizosphere	100	78.5	39.6
	22	CACC111	Bacillus megaterium	Ginseng rhizosphere	100	76.3	42.1
	23	CACC112	Bacillus megaterium	Ginseng rhizosphere	100	67.3	44.6
	24	CACC113	Variovorax boronicumulans	Ginseng rhizosphere	100	76.3	49.9
	25	CACC114	Bacillus megaterium	Ginseng rhizosphere	100	68.3	48.7
	26	CACC115	Bacillus megaterium	Ginseng rhizosphere	100	67.8	43.3
	27	CACC116	Bacillus megaterium	Ginseng rhizosphere	100	64.5	46.8
	28	CACC117	Bacillus megaterium	Ginseng rhizosphere	100	74.7	40.9
	29	CACC119	Bacillus megaterium	Ginseng rhizosphere	100	79.5	51.9
	30	CACC125	Variovorax boromicumulans	Ginseng rhizosphere	100	71.7	33.5
	31	CACC143	Paraburkholderia caledonica	Ginseng rhizosphere	100	78.7	47.5
