# Supplementary material for: Plant growth-promoting rhizobacterium Bacillus megaterium modulates the expression of antioxidant-related and drought-responsive genes to protect rice (Oryza sativa L.) from drought
Source: Front Microbiol. 2024 Aug 21;15:1430546. doi: 10.3389/fmicb.2024.1430546 (PMC11371581; doi:10.3389/fmicb.2024.1430546)
Supplement: Supplementary file 6 [file Table_3.xlsx]

## Sheet: Supplementary Table S3
	Supplementary Table S3. Genome assembly and annotation information for Bacillus megaterium CACC109 and CACC119.
	Feature	Bacillus megaterium CACC109	Bacillus megaterium CACC119
	Genome size (bp)	5309578	5703136
	GC content (%)	38.1	37.8
	Number of CDSs	5423	5787
	tRNA genes	130	187
	rRNA genes	42	49
	Genes allocated to KEGG	1820	1905
	Genes allocated to COG	3022	3209
