# Supplementary material for: Plant growth-promoting rhizobacterium Bacillus megaterium modulates the expression of antioxidant-related and drought-responsive genes to protect rice (Oryza sativa L.) from drought
Source: Front Microbiol. 2024 Aug 21;15:1430546. doi: 10.3389/fmicb.2024.1430546 (PMC11371581; doi:10.3389/fmicb.2024.1430546)
Supplement: Supplementary file 7 [file Table_4.xlsx]

## Sheet: Supplementary Table S4
	Supplementary Table S4. Plant growth-promoting (PGP)-related genes were identified in the draft genomes of Bacillus megaterium CACC109 and CACC119.
	PGP trait	Strains	CDS name	Other name(s)	EggNOG ID	KEGG ID	Product	Function	Note	Length	Location
	Phosphate solubilization	CACC109	CACC109_01235	phoA|phoB	P:COG1785	K01077	Alkaline phosphatase	Hydrolase; Magnesium; Metal-binding; Phosphoprotein; Signal; Zinc.	Belongs to the alkaline phosphatase family.; KEGG: bmq:BMQ_1220 alkaline phosphatase	1656	1210834..1212489
			CACC109_01616	paiA	S:ENOG4111UAW	K22441	Diamine N-acetyltransferase	Acyltransferase; Sporulation; Transferase.	Involved in the protection against polyamine toxicity by regulating their concentration. Also could be involved in the negative control of sporulation as well as production of degradative enzymes such as alpha-amylase, levansucrase and alkaline phosphatase. Catalyzes the transfer of an acetyl group from acetyl coenzyme A (AcCoA) to an acceptor substrate and releases both CoA and the acetylated pr…	528	1604659..1605186
			CACC109_01671	phoA|phoB	S:COG0586	K01077	Alkaline phosphatase	Cell membrane; Membrane; Transmembrane; Transmembrane helix.	Belongs to the DedA family.; KEGG: gtn:GTNG_0171 alkaline phosphatase	1293	complement(1649235..1650527)
			CACC109_02280		C:COG1757	K03315	Na(+)/H(+) antiporter NhaC	Antiport; Cell membrane; Ion transport; Membrane; Sodium; Sodium transport; Transmembrane; Transmembrane helix; Transport.	Is a secondary, electrogenic Na(+)/H(+) antiporter that catalyzes Na(+) uptake and proton efflux. Makes modest contributions to pH homeostasis in the alkaline range of pH but is not contributor to Na(+) resistance. Appears to have a repressive effect on growth and on alkaline phosphatases production in the presence of sodium, by affecting the transcription of the phoP/phoR two-component regulator…	1311	2224430..2225740
			CACC109_03010		T:ENOG410XNMH	K02483	Alkaline phosphatase synthesis transcriptional regulatory protein PhoP	Activator; Cytoplasm; DNA-binding; Phosphate transport; Phosphoprotein; Transcription; Transcription regulation; Transport; Two-component regulatory system.	Member of the two-component regulatory system PhoP/PhoR involved in the regulation of alkaline phosphatase genes phoA and phoB and of phosphodiesterase. Contains 1 OmpR/PhoB-type DNA-binding domain; Contains 1 response regulatory domain.	753	complement(2911145..2911897)
			CACC109_03495		K:COG2808	K07734	Protease synthase and sporulation protein PAI	Sporulation.	Involved in the reduction of extracellular and cell- associated protease levels, as well as in the reduced levels of alpha-amylase, levansucrase, alkaline phosphatase and sporulation inhibition, when present in high copy number. Belongs to the PaiB family.	624	complement(3328995..3329618)
			CACC109_04805	phoR	T:ENOG410XNMH	K07636	Histidine kinase	ATP-binding; Cell membrane; Kinase; Membrane; Nucleotide-binding; Phosphate transport; Phosphoprotein; Transferase; Transmembrane; Transmembrane helix; Transport; Two-component regulatory system.	Member of the two-component regulatory system PhoP/PhoR involved in the alkaline phosphatase genes regulation. PhoR may function as a membrane-associated protein kinase that phosphorylates PhoP in response to environmental signals. Contains 1 histidine kinase domain; Contains 1 PAS (PER-ARNT-SIM) domain.; KEGG: bsu:BSU29100 two-component system, OmpR family, phosphate regulon sensor histidine kin…	1773	complement(4570909..4572681)
			CACC109_05140	phoD	P:COG3540	K01113	Alkaline phosphatase	Hydrolase; Signal; Stress response.	Belongs to the PhoD family.; KEGG: bmh:BMWSH_0183 alkaline phosphatase D	1761	complement(4880160..4881920)
			CACC109_04806		T:ENOG4111I86	K07657	Phosphate regulon transcriptional regulatory protein	Activator; Cytoplasm; DNA-binding; Phosphate transport; Phosphoprotein; Transcription; Transcription regulation; Transport; Two-component regulatory system.	This protein is a positive regulator for the phosphate regulon. Transcription of this operon is positively regulated by PhoB and PhoR when phosphate is limited (By similarity); Contains 1 OmpR/PhoB-type DNA-binding domain; Contains 1 response regulatory domain.	717	complement(4572674..4573390)
			CACC109_05307		T:COG0745	K07657	Phosphate regulon transcriptional regulatory protein	Activator; Cytoplasm; DNA-binding; Phosphate transport; Phosphoprotein; Transcription; Transcription regulation; Transport; Two-component regulatory system.	This protein is a positive regulator for the phosphate regulon. Transcription of this operon is positively regulated by PhoB and PhoR when phosphate is limited (By similarity); Contains 1 OmpR/PhoB-type DNA-binding domain; Contains 1 response regulatory domain.	708	complement(5059765..5060472)
			CACC109_00476	ugpC	G:COG3839	K05816	Glycerol-3-phosphate-transporting ATPase	ATP-binding; Cell inner membrane; Cell membrane; Hydrolase; Membrane; Nucleotide-binding; Sugar transport; Transport.	Part of the ABC transporter complex UgpABCE involved in sn-glycerol-3-phosphate import. Responsible for energy coupling to the transport system; Belongs to the ABC transporter superfamily. sn- glycerol-3-phosphate importer (TC 3.A.1.1.3) family; Contains 1 ABC transporter domain.; KEGG: bmq:BMQ_0460 sn-glycerol 3-phosphate transport system ATP-binding protein	1116	432567..433682
			CACC109_01528	ABC.FEV.A	P:COG1120	K02013	Iron-chelate-transporting ATPase	ATP-binding; Cell membrane; Hydrolase; Membrane; Nucleotide-binding; Phosphate transport; Transport.	Part of the ABC transporter complex PstSACB involved in phosphate import. Responsible for energy coupling to the transport system; Belongs to the ABC transporter superfamily. Phosphate importer (TC 3.A.1.7) family; Contains 1 ABC transporter domain.; KEGG: bmq:BMQ_1529 iron complex transport system ATP-binding protein	795	complement(1502604..1503398)
			CACC109_01974	ugpC	S:COG0488	K05816	Glycerol-3-phosphate-transporting ATPase	ATP-binding; Cell inner membrane; Cell membrane; Cytoplasm; Hydrolase; Membrane; Nucleotide-binding; Transport.	Part of the ABC transporter complex LptBFG involved in the translocation of lipopolysaccharide (LPS) from the inner membrane to the outer membrane. Probably responsible for energy coupling to the transport system (By similarity); Belongs to the ABC transporter superfamily. Outer membrane lipopolysaccharide export (TC 1.B.42) family; Contains 1 ABC transporter domain.; KEGG: kpnk:BN49_4758 sn-glyc…	1899	1932611..1934509
			CACC109_02278	ABC.FEV.A	P:COG1129	K02013	Iron-chelate-transporting ATPase	ATP-binding; Cell membrane; Hydrolase; Membrane; Nucleotide-binding; Phosphate transport; Transport.	Part of the ABC transporter complex PstSACB involved in phosphate import. Responsible for energy coupling to the transport system; Belongs to the ABC transporter superfamily. Phosphate importer (TC 3.A.1.7) family; Contains 1 ABC transporter domain.; KEGG: psi:S70_19420 iron complex transport system ATP-binding protein	915	2222462..2223376
			CACC109_03010		T:ENOG410XNMH	K02483	Alkaline phosphatase synthesis transcriptional regulatory protein PhoP	Activator; Cytoplasm; DNA-binding; Phosphate transport; Phosphoprotein; Transcription; Transcription regulation; Transport; Two-component regulatory system.	Member of the two-component regulatory system PhoP/PhoR involved in the regulation of alkaline phosphatase genes phoA and phoB and of phosphodiesterase. Contains 1 OmpR/PhoB-type DNA-binding domain; Contains 1 response regulatory domain.	753	complement(2911145..2911897)
			CACC109_04553		P:COG0704	K02039	Phosphate-specific transport system accessory protein PhoU like protein	Cytoplasm; Phosphate transport; Transport.	Plays a role in the regulation of phosphate uptake; Belongs to the PhoU family.	660	complement(4325842..4326501)
			CACC109_04554	pstB	P:COG1129	K02036	Phosphate-transporting ATPase	ATP-binding; Cell membrane; Hydrolase; Membrane; Nucleotide-binding; Phosphate transport; Transport.	Part of the ABC transporter complex PstSACB involved in phosphate import. Responsible for energy coupling to the transport system; Belongs to the ABC transporter superfamily. Phosphate importer (TC 3.A.1.7) family; Contains 1 ABC transporter domain.; KEGG: bmd:BMD_4498 phosphate transport system ATP-binding protein	810	complement(4326524..4327333)
			CACC109_04663		P:COG0573	K02037	Phosphate transport system permease protein PstC	Cell inner membrane; Cell membrane; Membrane; Phosphate transport; Transmembrane; Transmembrane helix; Transport.	Part of the binding-protein-dependent transport system for phosphat; probably responsible for the translocation of the substrate across the membrane; Belongs to the binding-protein-dependent transport system permease family. CysTW subfamily; Contains 1 ABC transmembrane type-1 domain.	888	complement(4424058..4424945)
			CACC109_04664		P:COG0226	K02040	Phosphate-binding protein PstS	Cell membrane; Lipoprotein; Membrane; Palmitate; Phosphate transport; Signal; Transport.	Part of the ABC transporter complex PstSACB involved in phosphate import; Belongs to the PstS family.	885	complement(4425070..4425954)
			CACC109_04749		P:COG0306	K03306	Probable low-affinity inorganic phosphate transporter	Cell membrane; Membrane; Phosphate transport; Transmembrane; Transmembrane helix; Transport.	Low-affinity inorganic phosphate transport; Belongs to the inorganic phosphate transporter (PiT) (TC 2.A.20) family. Pit subfamily.	999	complement(4513407..4514405)
			CACC109_04805	phoR	T:ENOG410XNMH	K07636	Histidine kinase	ATP-binding; Cell membrane; Kinase; Membrane; Nucleotide-binding; Phosphate transport; Phosphoprotein; Transferase; Transmembrane; Transmembrane helix; Transport; Two-component regulatory system.	Member of the two-component regulatory system PhoP/PhoR involved in the alkaline phosphatase genes regulation. PhoR may function as a membrane-associated protein kinase that phosphorylates PhoP in response to environmental signals. Contains 1 histidine kinase domain; Contains 1 PAS (PER-ARNT-SIM) domain.; KEGG: bsu:BSU29100 two-component system, OmpR family, phosphate regulon sensor histidine kin…	1773	complement(4570909..4572681)
			CACC109_04806		T:ENOG4111I86	K07657	Phosphate regulon transcriptional regulatory protein	Activator; Cytoplasm; DNA-binding; Phosphate transport; Phosphoprotein; Transcription; Transcription regulation; Transport; Two-component regulatory system.	This protein is a positive regulator for the phosphate regulon. Transcription of this operon is positively regulated by PhoB and PhoR when phosphate is limited (By similarity); Contains 1 OmpR/PhoB-type DNA-binding domain; Contains 1 response regulatory domain.	717	complement(4572674..4573390)
			CACC109_04906	ugpC	P:COG1116	K05816	Glycerol-3-phosphate-transporting ATPase	Antibiotic resistance; ATP-binding; Cell inner membrane; Cell membrane; Hydrolase; Membrane; Nucleotide-binding; Transmembrane; Transmembrane helix; Transport.	Non-canonical ABC transporter that contains transmembrane domains (TMD), which form a pore in the inner membrane, and an ATP-binding domain (NBD), which is responsible for energy generation. Confers resistance against macrolides; Belongs to the ABC transporter superfamily. Macrolide exporter (TC 3.A.1.122) family; Contains 1 ABC transporter domain.; KEGG: cfu:CFU_1202 sn-glycerol 3-phosphate tran…	771	4676791..4677561
			CACC109_04969		P:COG0306	K16331	Sulfate permease CysP	Cell membrane; Membrane; Sulfate transport; Transmembrane; Transmembrane helix; Transport.	Involved in the import of sulfate; Belongs to the inorganic phosphate transporter (PiT) (TC 2.A.20) family.	1080	complement(4725017..4726096)
			CACC109_05307		T:COG0745	K07657	Phosphate regulon transcriptional regulatory protein	Activator; Cytoplasm; DNA-binding; Phosphate transport; Phosphoprotein; Transcription; Transcription regulation; Transport; Two-component regulatory system.	This protein is a positive regulator for the phosphate regulon. Transcription of this operon is positively regulated by PhoB and PhoR when phosphate is limited (By similarity); Contains 1 OmpR/PhoB-type DNA-binding domain; Contains 1 response regulatory domain.	708	complement(5059765..5060472)
		CACC119	CACC119_05345	phoD	P:COG3540	K01113	Alkaline phosphatase	Hydrolase; Signal; Stress response.	Belongs to the PhoD family.; KEGG: bmq:BMQ_5095 alkaline phosphatase D	1761	complement(211955..213715)
			CACC119_00412	phoA|phoB	S:COG0586	K01077	Alkaline phosphatase	Cell membrane; Membrane; Transmembrane; Transmembrane helix.	Belongs to the DedA family.; KEGG: oih:OB2407 alkaline phosphatase	594	complement(283797..284390)
			CACC119_00413	nfi	L:COG1515	K05982	Deoxyribonuclease V	Cytoplasm; DNA damage; DNA repair; Endonuclease; Hydrolase; Magnesium; Metal-binding; Nuclease.	DNA repair enzyme involved in the repair of deaminated bases. Selectively cleaves double-stranded DNA at the second phosphodiester bond 3' to a deoxyinosine leaving behind the intact lesion on the nicked DNA; Belongs to the endonuclease V family.; KEGG: bmq:BMQ_2669 deoxyribonuclease V	720	complement(284474..285193)
			CACC119_01177		K:COG2808	K07734	Protease synthase and sporulation protein PAI	Sporulation.	Involved in the reduction of extracellular and cell- associated protease levels, as well as in the reduced levels of alpha-amylase, levansucrase, alkaline phosphatase and sporulation inhibition, when present in high copy number. Belongs to the PaiB family.	624	complement(969778..970401)
			CACC119_02516	phoR	T:ENOG410XNMH	K07636	Histidine kinase	ATP-binding; Cell membrane; Kinase; Membrane; Nucleotide-binding; Phosphate transport; Phosphoprotein; Transferase; Transmembrane; Transmembrane helix; Transport; Two-component regulatory system.	Member of the two-component regulatory system PhoP/PhoR involved in the alkaline phosphatase genes regulation. PhoR may function as a membrane-associated protein kinase that phosphorylates PhoP in response to environmental signals. Contains 1 histidine kinase domain; Contains 1 PAS (PER-ARNT-SIM) domain.; KEGG: bsu:BSU29100 two-component system, OmpR family, phosphate regulon sensor histidine kin…	1773	complement(2225693..2227465)
			CACC119_03868	phoA|phoB	P:COG1785	K01077	Alkaline phosphatase	Hydrolase; Magnesium; Metal-binding; Phosphoprotein; Signal; Zinc.	Belongs to the alkaline phosphatase family.; KEGG: bmq:BMQ_1220 alkaline phosphatase	1656	3547763..3549418
			CACC119_04163	phoA|phoB	P:COG1785	K01077	Alkaline phosphatase	Hydrolase; Magnesium; Membrane; Metal-binding; Phosphoprotein; Signal-anchor; Transmembrane; Transmembrane helix; Zinc.	Belongs to the alkaline phosphatase family.; KEGG: bmq:BMQ_1515 alkaline phosphatase	1257	3842069..3843325
			CACC119_04330	paiA	K:COG0454	K22441	Diamine N-acetyltransferase	Acyltransferase; Sporulation; Transferase.	Involved in the protection against polyamine toxicity by regulating their concentration. Also could be involved in the negative control of sporulation as well as production of degradative enzymes such as alpha-amylase, levansucrase and alkaline phosphatase. Catalyzes the transfer of an acetyl group from acetyl coenzyme A (AcCoA) to an acceptor substrate and releases both CoA and the acetylated pr…	525	4012051..4012575
			CACC119_04386	phoA|phoB	S:COG0586	K01077	Alkaline phosphatase	Cell membrane; Membrane; Transmembrane; Transmembrane helix.	Belongs to the DedA family.; KEGG: gtn:GTNG_0171 alkaline phosphatase	1293	complement(4056028..4057320)
			CACC119_04924		C:COG1757	K03315	Na(+)/H(+) antiporter NhaC	Antiport; Cell membrane; Ion transport; Membrane; Sodium; Sodium transport; Transmembrane; Transmembrane helix; Transport.	Is a secondary, electrogenic Na(+)/H(+) antiporter that catalyzes Na(+) uptake and proton efflux. Makes modest contributions to pH homeostasis in the alkaline range of pH but is not contributor to Na(+) resistance. Appears to have a repressive effect on growth and on alkaline phosphatases production in the presence of sodium, by affecting the transcription of the phoP/phoR two-component regulator…	1311	4579490..4580800
			CACC119_05495	phoR	T:COG0642	K07636	Histidine kinase	ATP-binding; Cell membrane; Kinase; Membrane; Nucleotide-binding; Phosphoprotein; Transferase; Transmembrane; Transmembrane helix; Two-component regulatory system.	Could be member of the two-component regulatory system YclK/YclJ. Potentially phosphorylates YclJ; Contains 1 HAMP domain; Contains 1 histidine kinase domain.; KEGG: rob:CK5_34600 two-component system, OmpR family, phosphate regulon sensor histidine kinase PhoR	2262	complement(368333..370594)
			CACC119_05509		T:COG0745	K07657	Phosphate regulon transcriptional regulatory protein	Activator; Cytoplasm; DNA-binding; Phosphate transport; Phosphoprotein; Transcription; Transcription regulation; Transport; Two-component regulatory system.	This protein is a positive regulator for the phosphate regulon. Transcription of this operon is positively regulated by PhoB and PhoR when phosphate is limited (By similarity); Contains 1 OmpR/PhoB-type DNA-binding domain; Contains 1 response regulatory domain.	708	complement(386828..387535)
			CACC119_02517		T:ENOG4111I86	K07657	Phosphate regulon transcriptional regulatory protein	Activator; Cytoplasm; DNA-binding; Phosphate transport; Phosphoprotein; Transcription; Transcription regulation; Transport; Two-component regulatory system.	This protein is a positive regulator for the phosphate regulon. Transcription of this operon is positively regulated by PhoB and PhoR when phosphate is limited (By similarity); Contains 1 OmpR/PhoB-type DNA-binding domain; Contains 1 response regulatory domain.	717	complement(2227458..2228174)
			CACC119_04582	phoR	T:ENOG410XNMH	K07636	Histidine kinase	ATP-binding; Cell membrane; Kinase; Membrane; Nucleotide-binding; Phosphoprotein; Transferase; Transmembrane; Transmembrane helix; Two-component regulatory system.	Member of the two-component regulatory system WalK/WalR that regulates genes involved in autolysis, biofilm formation and cell wall metabolism. WalK functions as a sensor protein kinase which is autophosphorylated at a histidine residue and transfers its phosphate group to WalR (By similarity); Contains 1 HAMP domain; Contains 1 histidine kinase domain; Contains 1 PAC (PAS-associated C-terminal) …	1377	4258170..4259546
			CACC119_05175		P:COG0306	K16331	Sulfate permease CysP	Cell membrane; Membrane; Sulfate transport; Transmembrane; Transmembrane helix; Transport.	Involved in the import of sulfate; Belongs to the inorganic phosphate transporter (PiT) (TC 2.A.20) family.	1080	complement(56687..57766)
			CACC119_05509		T:COG0745	K07657	Phosphate regulon transcriptional regulatory protein	Activator; Cytoplasm; DNA-binding; Phosphate transport; Phosphoprotein; Transcription; Transcription regulation; Transport; Two-component regulatory system.	This protein is a positive regulator for the phosphate regulon. Transcription of this operon is positively regulated by PhoB and PhoR when phosphate is limited (By similarity); Contains 1 OmpR/PhoB-type DNA-binding domain; Contains 1 response regulatory domain.	708	complement(386828..387535)
			CACC119_00712		T:ENOG410XNMH	K07657	Alkaline phosphatase synthesis transcriptional regulatory protein PhoP	Activator; Cytoplasm; DNA-binding; Phosphate transport; Phosphoprotein; Transcription; Transcription regulation; Transport; Two-component regulatory system.	Member of the two-component regulatory system PhoP/PhoR involved in the regulation of alkaline phosphatase genes phoA and phoB and of phosphodiesterase. Contains 1 OmpR/PhoB-type DNA-binding domain; Contains 1 response regulatory domain.	711	complement(566115..566825)
			CACC119_02261		P:COG0704	K02039	Phosphate-specific transport system accessory protein PhoU like protein	Cytoplasm; Phosphate transport; Transport.	Plays a role in the regulation of phosphate uptake; Belongs to the PhoU family.	660	complement(1979023..1979682)
			CACC119_02262	pstB	P:COG1117	K02036	Phosphate-transporting ATPase	ATP-binding; Cell membrane; Hydrolase; Membrane; Nucleotide-binding; Phosphate transport; Transport.	Part of the ABC transporter complex PstSACB involved in phosphate import. Responsible for energy coupling to the transport system; Belongs to the ABC transporter superfamily. Phosphate importer (TC 3.A.1.7) family; Contains 1 ABC transporter domain.; KEGG: bmd:BMD_4498 phosphate transport system ATP-binding protein	810	complement(1979705..1980514)
			CACC119_02372		P:COG0573	K02037	Phosphate transport system permease protein PstC	Cell inner membrane; Cell membrane; Membrane; Phosphate transport; Transmembrane; Transmembrane helix; Transport.	Part of the binding-protein-dependent transport system for phosphat; probably responsible for the translocation of the substrate across the membrane; Belongs to the binding-protein-dependent transport system permease family. CysTW subfamily; Contains 1 ABC transmembrane type-1 domain.	888	complement(2078846..2079733)
			CACC119_02373		P:COG0226	K02040	Phosphate-binding protein PstS	Cell membrane; Lipoprotein; Membrane; Palmitate; Phosphate transport; Signal; Transport.	Part of the ABC transporter complex PstSACB involved in phosphate import; Belongs to the PstS family.	885	complement(2079858..2080742)
			CACC119_02460		P:COG0306	K03306	Probable low-affinity inorganic phosphate transporter	Cell membrane; Membrane; Phosphate transport; Transmembrane; Transmembrane helix; Transport.	Low-affinity inorganic phosphate transport; Belongs to the inorganic phosphate transporter (PiT) (TC 2.A.20) family. Pit subfamily.	999	complement(2168226..2169224)
			CACC119_02516	phoR	T:ENOG410XNMH	K07636	Histidine kinase	ATP-binding; Cell membrane; Kinase; Membrane; Nucleotide-binding; Phosphate transport; Phosphoprotein; Transferase; Transmembrane; Transmembrane helix; Transport; Two-component regulatory system.	Member of the two-component regulatory system PhoP/PhoR involved in the alkaline phosphatase genes regulation. PhoR may function as a membrane-associated protein kinase that phosphorylates PhoP in response to environmental signals. Contains 1 histidine kinase domain; Contains 1 PAS (PER-ARNT-SIM) domain.; KEGG: bsu:BSU29100 two-component system, OmpR family, phosphate regulon sensor histidine kin…	1773	complement(2225693..2227465)
			CACC119_02517		T:ENOG4111I86	K07657	Phosphate regulon transcriptional regulatory protein	Activator; Cytoplasm; DNA-binding; Phosphate transport; Phosphoprotein; Transcription; Transcription regulation; Transport; Two-component regulatory system.	This protein is a positive regulator for the phosphate regulon. Transcription of this operon is positively regulated by PhoB and PhoR when phosphate is limited (By similarity); Contains 1 OmpR/PhoB-type DNA-binding domain; Contains 1 response regulatory domain.	717	complement(2227458..2228174)
			CACC119_03124	ugpC	G:COG3839	K05816	Glycerol-3-phosphate-transporting ATPase	ATP-binding; Cell inner membrane; Cell membrane; Hydrolase; Membrane; Nucleotide-binding; Sugar transport; Transport.	Part of the ABC transporter complex UgpABCE involved in sn-glycerol-3-phosphate import. Responsible for energy coupling to the transport system; Belongs to the ABC transporter superfamily. sn- glycerol-3-phosphate importer (TC 3.A.1.1.3) family; Contains 1 ABC transporter domain.; KEGG: bmq:BMQ_0460 sn-glycerol 3-phosphate transport system ATP-binding protein	1116	2786839..2787954
			CACC119_03636	ugpC	S:COG1137	K05816	Glycerol-3-phosphate-transporting ATPase	ATP-binding; Cell inner membrane; Cell membrane; Hydrolase; Ion transport; Iron; Iron transport; Membrane; Nucleotide-binding; Transport.	Part of the ABC transporter complex FbpABC involved in Fe(3+) ions import. Responsible for energy coupling to the transport system; Belongs to the ABC transporter superfamily. Fe(3+) ion importer (TC 3.A.1.10) family; Contains 1 ABC transporter domain.; KEGG: llg:44548918_01260 sn-glycerol 3-phosphate transport system ATP-binding protein	780	complement(3308665..3309444)
			CACC119_04177	ABC.FEV.A	P:COG1120	K02013	Iron-chelate-transporting ATPase	ATP-binding; Cell membrane; Hydrolase; Membrane; Nucleotide-binding; Phosphate transport; Transport.	Part of the ABC transporter complex PstSACB involved in phosphate import. Responsible for energy coupling to the transport system; Belongs to the ABC transporter superfamily. Phosphate importer (TC 3.A.1.7) family; Contains 1 ABC transporter domain.; KEGG: bmq:BMQ_1529 iron complex transport system ATP-binding protein	795	complement(3853557..3854351)
			CACC119_04637	ugpC	S:COG0488	K05816	Glycerol-3-phosphate-transporting ATPase	ATP-binding; Cell inner membrane; Cell membrane; Cytoplasm; Hydrolase; Membrane; Nucleotide-binding; Transport.	Part of the ABC transporter complex LptBFG involved in the translocation of lipopolysaccharide (LPS) from the inner membrane to the outer membrane. Probably responsible for energy coupling to the transport system (By similarity); Belongs to the ABC transporter superfamily. Outer membrane lipopolysaccharide export (TC 1.B.42) family; Contains 1 ABC transporter domain.; KEGG: kpnk:BN49_4758 sn-glyc…	1899	4306540..4308438
			CACC119_04922	ABC.FEV.A	P:COG1129	K02013	Iron-chelate-transporting ATPase	ATP-binding; Cell membrane; Hydrolase; Membrane; Nucleotide-binding; Phosphate transport; Transport.	Part of the ABC transporter complex PstSACB involved in phosphate import. Responsible for energy coupling to the transport system; Belongs to the ABC transporter superfamily. Phosphate importer (TC 3.A.1.7) family; Contains 1 ABC transporter domain.; KEGG: psi:S70_19420 iron complex transport system ATP-binding protein	915	4577522..4578436
	Nitrogen fixation	CACC109	CACC109_02859	draG	O:COG1397	K05521	ADP-ribosyl-[dinitrogen reductase] hydrolase	Hydrolase; Nitrogen fixation.	Involved in the regulation of the nitrogen fixation activity by the reversible ADP-ribosylation of the dinitrogenase reductase component of the nitrogenase enzyme complex. The ADP- ribosyltransferase (DraT) transfers the ADP-ribose group from NAD to dinitrogenase reductase. The ADP-ribose group is removed through the action of the ADP-ribosylglycohydrolase (DraG). Belongs to the ADP-ribosylglycoh…	930	complement(2768016..2768945)
		CACC119	CACC119_00498	draG	O:COG1397	K05521	ADP-ribosyl-[dinitrogen reductase] hydrolase	Hydrolase; Nitrogen fixation.	Involved in the regulation of the nitrogen fixation activity by the reversible ADP-ribosylation of the dinitrogenase reductase component of the nitrogenase enzyme complex. The ADP- ribosyltransferase (DraT) transfers the ADP-ribose group from NAD to dinitrogenase reductase. The ADP-ribose group is removed through the action of the ADP-ribosylglycohydrolase (DraG). Belongs to the ADP-ribosylglycoh…	933	complement(363476..364408)
	IAA biosynthesis	CACC109	CACC109_01043	amiE	J:COG0154	K01426	Amidase	Acetylation; Auxin biosynthesis; Cytoplasm; Hydrolase.	Amidase involved in auxin biosynthesis. Converts indole- 3-acetamide into indole-3-acetic acid. Can also use L-asparagine, oleamide and 1-naphtalene-acetamide as substrates, but not indole- 3-acetonitrile or indole-3-acetyl-L-aspartic acid; Belongs to the amidase family.; KEGG: bmq:BMQ_1036 amidase	1200	999336..1000535
			CACC109_00727	WARS|trpS	J:COG0180	K01867	Tryptophan--tRNA ligase	Aminoacyl-tRNA synthetase; ATP-binding; Cytoplasm; Ligase; Nucleotide-binding; Protein biosynthesis.	Belongs to the class-I aminoacyl-tRNA synthetase family.; KEGG: hoh:Hoch_0142 tryptophanyl-tRNA synthetase	987	complement(675315..676301)
			CACC109_04363	trpA	E:COG0159	K01695	Tryptophan synthase	Amino-acid biosynthesis; Aromatic amino acid biosynthesis; Lyase; Tryptophan biosynthesis.	The alpha subunit is responsible for the aldol cleavage of indoleglycerol phosphate to indole and glyceraldehyde 3- phosphate; Belongs to the TrpA family.; KEGG: bmq:BMQ_4318 tryptophan synthase alpha chain	816	complement(4146398..4147213)
			CACC109_04364	trpF	E:COG0135	K01817	Phosphoribosylanthranilate isomerase	Amino-acid biosynthesis; Aromatic amino acid biosynthesis; Isomerase; Tryptophan biosynthesis.	Belongs to the TrpF family.; KEGG: bmq:BMQ_4320 phosphoribosylanthranilate isomerase	1839	complement(4147200..4149038)
			CACC109_04365	trpC	E:COG0134	K01609	Indole-3-glycerol-phosphate synthase	Amino-acid biosynthesis; Aromatic amino acid biosynthesis; Decarboxylase; Lyase; Tryptophan biosynthesis.	Belongs to the TrpC family.; KEGG: bmq:BMQ_4321 indole-3-glycerol phosphate synthase	768	complement(4149028..4149795)
			CACC109_04366	trpD	E:COG0547	K00766	Anthranilate phosphoribosyltransferase	Amino-acid biosynthesis; Aromatic amino acid biosynthesis; Glycosyltransferase; Magnesium; Metal-binding; Transferase; Tryptophan biosynthesis.	Catalyzes the transfer of the phosphoribosyl group of 5- phosphorylribose-1-pyrophosphate (PRPP) to anthranilate to yield N-(5'-phosphoribosyl)-anthranilate (PRA); Belongs to the anthranilate phosphoribosyltransferase family.; KEGG: bpf:BpOF4_15460 anthranilate phosphoribosyltransferase	1026	complement(4149785..4150810)
			CACC109_04367	trpE	E:COG0147	K01657	Anthranilate synthase	Amino-acid biosynthesis; Aromatic amino acid biosynthesis; Lyase; Magnesium; Metal-binding; Tryptophan biosynthesis.	Part of a heterotetrameric complex that catalyzes the two-step biosynthesis of anthranilate, an intermediate in the biosynthesis of L-tryptophan. In the first step, the glutamine- binding beta subunit (TrpG) of anthranilate synthase (AS) provides the glutamine amidotransferase activity which generates ammonia as a substrate that, along with chorismate, is used in the second step, catalyzed by the…	1515	complement(4150803..4152317)
		CACC119	CACC119_03688	amiE	J:COG0154	K01426	Amidase	Acetylation; Auxin biosynthesis; Cytoplasm; Hydrolase.	Amidase involved in auxin biosynthesis. Converts indole- 3-acetamide into indole-3-acetic acid. Can also use L-asparagine, oleamide and 1-naphtalene-acetamide as substrates, but not indole- 3-acetonitrile or indole-3-acetyl-L-aspartic acid; Belongs to the amidase family.; KEGG: bmq:BMQ_1036 amidase	1200	3355570..3356769
			CACC119_03372	WARS|trpS	J:COG0180	K01867	Tryptophan--tRNA ligase	Aminoacyl-tRNA synthetase; ATP-binding; Cytoplasm; Ligase; Nucleotide-binding; Protein biosynthesis.	Belongs to the class-I aminoacyl-tRNA synthetase family.; KEGG: hoh:Hoch_0142 tryptophanyl-tRNA synthetase	987	complement(3031025..3032011)
			CACC119_02070	trpA	E:COG0159	K01695	Tryptophan synthase	Amino-acid biosynthesis; Aromatic amino acid biosynthesis; Lyase; Tryptophan biosynthesis.	The alpha subunit is responsible for the aldol cleavage of indoleglycerol phosphate to indole and glyceraldehyde 3- phosphate; Belongs to the TrpA family.; KEGG: bmq:BMQ_4318 tryptophan synthase alpha chain	816	complement(1799828..1800643)
			CACC119_02071	trpB	E:COG0133	K01696	Tryptophan synthase	Amino-acid biosynthesis; Aromatic amino acid biosynthesis; Lyase; Pyridoxal phosphate; Tryptophan biosynthesis.	The beta subunit is responsible for the synthesis of L- tryptophan from indole and L-serine; Belongs to the TrpB family.; KEGG: bmq:BMQ_4319 tryptophan synthase beta chain	1215	complement(1800630..1801844)
			CACC119_02072	trpF	E:COG0135	K01817	Phosphoribosylanthranilate isomerase	Amino-acid biosynthesis; Aromatic amino acid biosynthesis; Isomerase; Tryptophan biosynthesis.	Belongs to the TrpF family.; KEGG: bmq:BMQ_4320 phosphoribosylanthranilate isomerase	627	complement(1801841..1802467)
			CACC119_02073	trpC	E:COG0134	K01609	Indole-3-glycerol-phosphate synthase	Amino-acid biosynthesis; Aromatic amino acid biosynthesis; Decarboxylase; Lyase; Tryptophan biosynthesis.	Belongs to the TrpC family.; KEGG: bmq:BMQ_4321 indole-3-glycerol phosphate synthase	768	complement(1802457..1803224)
			CACC119_00777	trpD	E:COG0547	K00766	Anthranilate phosphoribosyltransferase	Amino-acid biosynthesis; Aromatic amino acid biosynthesis; Glycosyltransferase; Magnesium; Metal-binding; Transferase; Tryptophan biosynthesis.	Catalyzes the transfer of the phosphoribosyl group of 5- phosphorylribose-1-pyrophosphate (PRPP) to anthranilate to yield N-(5'-phosphoribosyl)-anthranilate (PRA); Belongs to the anthranilate phosphoribosyltransferase family.; KEGG: blh:BaLi_c35040 anthranilate phosphoribosyltransferase	1050	complement(629775..630824)
			CACC119_02075	trpE	E:COG0147	K01657	Anthranilate synthase	Amino-acid biosynthesis; Aromatic amino acid biosynthesis; Lyase; Magnesium; Metal-binding; Tryptophan biosynthesis.	Part of a heterotetrameric complex that catalyzes the two-step biosynthesis of anthranilate, an intermediate in the biosynthesis of L-tryptophan. In the first step, the glutamine- binding beta subunit (TrpG) of anthranilate synthase (AS) provides the glutamine amidotransferase activity which generates ammonia as a substrate that, along with chorismate, is used in the second step, catalyzed by the…	1515	complement(1804232..1805746)
	Siderophore synthesis	CACC109	CACC109_05061	bdh	S:COG1028	K00019	3-hydroxybutyrate dehydrogenase	Cytoplasm; NAD; Oxidoreductase.	Dehydrogenase that mediates the formation of 2,5- dihydroxybenzoic acid (2,5-DHBA), a siderophore that shares structural similarities with bacterial enterobactin and associates with LCN2, thereby playing a key role in iron homeostasis and transport. Also acts as a 3-hydroxybutyrate dehydrogenase (By similarity); Belongs to the short-chain dehydrogenases/reductases (SDR) family.; KEGG: lum:CNR27_1…	795	4805386..4806180
			CACC109_04441		K:COG0735	K03711	Ferric uptake regulation protein	Cytoplasm; DNA-binding; Iron; Metal-binding; Repressor; Transcription; Transcription regulation; Zinc.	Iron uptake repressor. Acts on the transcription of ferri-siderophore uptake genes. Belongs to the Fur family.	453	complement(4219024..4219476)
			CACC109_05053		P:COG0609	K02015	Probable siderophore transport system permease protein YfhA	Cell membrane; Ion transport; Iron; Iron transport; Membrane; Transmembrane; Transmembrane helix; Transport.	Part of the ABC transporter complex YfiYZ/YfhA/YusV involved in import of the iron-hydroxamate siderophores schizokinen, arthrobactin and corprogen; Belongs to the binding-protein-dependent transport system permease family. FecCD subfamily.	1050	complement(4796647..4797696)
			CACC109_05054		P:COG0609	K02015	Probable siderophore transport system permease protein YfiZ	Cell membrane; Ion transport; Iron; Iron transport; Membrane; Signal; Transmembrane; Transmembrane helix; Transport.	Part of the ABC transporter complex YfiYZ/YfhA/YusV involved in import of the iron-hydroxamate siderophores schizokinen, arthrobactin and corprogen; Belongs to the binding-protein-dependent transport system permease family. FecCD subfamily.	1005	complement(4797693..4798697)
			CACC109_05055		P:COG0614	K02016	Probable siderophore-binding lipoprotein YfiY	Cell membrane; Cytoplasm; Ion transport; Iron; Iron transport; Lipoprotein; Membrane; Palmitate; Phosphoprotein; Signal; Transport.	Part of the ABC transporter complex YfiYZ/YfhA/YusV involved in import of the iron-hydroxamate siderophores schizokinen, arthrobactin and corprogen. Binds the siderophores and delivers them to the surface of YfiZ/YfhA (Probable); Belongs to the bacterial solute-binding protein 8 family; Contains 1 Fe/B12 periplasmic-binding domain.	987	4798877..4799863
			CACC109_04106	iucA	Q:COG4264	K03894	N(2)-citryl-N(6)-acetyl-N(6)-hydroxylysine synthase	ATP-binding; Ligase; Nucleotide-binding; Transferase.	Catalyzes the attachment of a first N-acetyl-N- hydroxylysine to a carboxylic group of citric acid to yield N- citryl-N-acetyl-N-hydroxylysine. Involved in the biosynthesis of the siderophore aerobactin which is a chelator that mediates the high-affinity iron transport systems induced under iron-stressed conditions; Belongs to the IucA family.; KEGG: kko:Kkor_2043 N2-citryl-N6-acetyl-N6-hydroxyly…	1755	complement(3880196..3881950)
			CACC109_04930	menF	H:COG1169	K02552	Isochorismate synthase	Isomerase; Magnesium; Menaquinone biosynthesis; Metal-binding.	Catalyzes the conversion of chorismate to isochorismate; Belongs to the isochorismate synthase family.; KEGG: bmq:BMQ_4892 menaquinone-specific isochorismate synthase	1422	complement(4699277..4700698)
		CACC119	CACC119_01818	iucA	Q:COG4264	K03894	N(2)-citryl-N(6)-acetyl-N(6)-hydroxylysine synthase	ATP-binding; Ligase; Nucleotide-binding; Transferase.	Catalyzes the attachment of a first N-acetyl-N- hydroxylysine to a carboxylic group of citric acid to yield N- citryl-N-acetyl-N-hydroxylysine. Involved in the biosynthesis of the siderophore aerobactin which is a chelator that mediates the high-affinity iron transport systems induced under iron-stressed conditions; Belongs to the IucA family.; KEGG: kko:Kkor_2043 N2-citryl-N6-acetyl-N6-hydroxyly…	1755	complement(1536645..1538399)
			CACC119_02149		K:COG0735	K03711	Ferric uptake regulation protein	Cytoplasm; DNA-binding; Iron; Metal-binding; Repressor; Transcription; Transcription regulation; Zinc.	Iron uptake repressor. Acts on the transcription of ferri-siderophore uptake genes. Belongs to the Fur family.	453	complement(1872472..1872924)
			CACC119_05259		P:COG0609	K02015	Probable siderophore transport system permease protein YfhA	Cell membrane; Ion transport; Iron; Iron transport; Membrane; Transmembrane; Transmembrane helix; Transport.	Part of the ABC transporter complex YfiYZ/YfhA/YusV involved in import of the iron-hydroxamate siderophores schizokinen, arthrobactin and corprogen; Belongs to the binding-protein-dependent transport system permease family. FecCD subfamily.	1050	complement(128567..129616)
			CACC119_05260		P:COG0609	K02015	Probable siderophore transport system permease protein YfiZ	Cell membrane; Ion transport; Iron; Iron transport; Membrane; Signal; Transmembrane; Transmembrane helix; Transport.	Part of the ABC transporter complex YfiYZ/YfhA/YusV involved in import of the iron-hydroxamate siderophores schizokinen, arthrobactin and corprogen; Belongs to the binding-protein-dependent transport system permease family. FecCD subfamily.	1005	complement(129613..130617)
			CACC119_05261		P:COG0614	K02016	Probable siderophore-binding lipoprotein YfiY	Cell membrane; Cytoplasm; Ion transport; Iron; Iron transport; Lipoprotein; Membrane; Palmitate; Phosphoprotein; Signal; Transport.	Part of the ABC transporter complex YfiYZ/YfhA/YusV involved in import of the iron-hydroxamate siderophores schizokinen, arthrobactin and corprogen. Binds the siderophores and delivers them to the surface of YfiZ/YfhA (Probable); Belongs to the bacterial solute-binding protein 8 family; Contains 1 Fe/B12 periplasmic-binding domain.	987	130795..131781
			CACC119_05267	bdh	S:COG1028	K00019	3-hydroxybutyrate dehydrogenase	Cytoplasm; NAD; Oxidoreductase.	Dehydrogenase that mediates the formation of 2,5- dihydroxybenzoic acid (2,5-DHBA), a siderophore that shares structural similarities with bacterial enterobactin and associates with LCN2, thereby playing a key role in iron homeostasis and transport. Also acts as a 3-hydroxybutyrate dehydrogenase (By similarity); Belongs to the short-chain dehydrogenases/reductases (SDR) family.; KEGG: lum:CNR27_1…	795	137307..138101
			CACC119_02641	menF	H:COG1169	K02552	Isochorismate synthase	Isomerase; Magnesium; Menaquinone biosynthesis; Metal-binding.	Catalyzes the conversion of chorismate to isochorismate; Belongs to the isochorismate synthase family.; KEGG: bmq:BMQ_4892 menaquinone-specific isochorismate synthase	1422	complement(2352755..2354176)
	ACC deaminase activity	CACC109	CACC109_03951	dcyD	E:COG2515	K05396	D-cysteine desulfhydrase	Lyase; Plasmid; Pyridoxal phosphate.	Catalyzes the desulfonation and deamination of L- cysteate, yielding pyruvate, sulphite and ammonium. Is involved in a L-cysteate degradation pathway that allows Silicibacter pomeroyi to grow on L-cysteate as the sole source of carbon and energy. To a lesser extent, can also act on D-cysteine in vitro, leading to the production of pyruvate, sulfide and ammonium. L-cysteine, L- cysteine sulfinate,…	993	complement(3732286..3733278)
		CACC119	CACC119_01670	dcyD	E:COG2515	K05396	D-cysteine desulfhydrase	Lyase; Plasmid; Pyridoxal phosphate.	Catalyzes the desulfonation and deamination of L- cysteate, yielding pyruvate, sulphite and ammonium. Is involved in a L-cysteate degradation pathway that allows Silicibacter pomeroyi to grow on L-cysteate as the sole source of carbon and energy. To a lesser extent, can also act on D-cysteine in vitro, leading to the production of pyruvate, sulfide and ammonium. L-cysteine, L- cysteine sulfinate,…	993	complement(1397191..1398183)
