# Supplementary material for: Plant growth-promoting rhizobacterium Bacillus megaterium modulates the expression of antioxidant-related and drought-responsive genes to protect rice (Oryza sativa L.) from drought
Source: Front Microbiol. 2024 Aug 21;15:1430546. doi: 10.3389/fmicb.2024.1430546 (PMC11371581; doi:10.3389/fmicb.2024.1430546)
Supplement: Supplementary file 8 [file Table_5.xlsx]

## Sheet: Supplementary Table S5
	Supplementary Table S5. Bacillus megaterium strains CACC109 and CACC119 contain genes related to motility and chemotaxis.
	Strains	CDS name	Other name(s)	EggNOG ID	KEGG ID	Product	Function	Note	Length	Location
	CACC109	CACC109_05505	cheBR	T:ENOG410XNMH	K13924	Protein-glutamate O-methyltransferase	ATP-binding; Chromophore; Flavoprotein; FMN; Kinase; Nucleotide-binding; Phosphoprotein; Photoreceptor protein; Receptor; Repeat; Sensory transduction; Transferase; Virulence.	Photosensitive kinase that is involved in increased bacterial virulence upon exposure to light. Once ejected from an infected animal host, sunlight acts as an environmental signal that increases the virulence of the bacterium, preparing it for infection of the next host. This photoreceptor protein is directly related to the bacterium's survival and replication within host macrophages (By similari…	786	67784..68569
		CACC109_00354		T:COG4565	K07702	Chemotaxis response regulator protein-glutamate methylesterase	Chemotaxis; Cytoplasm; Hydrolase; Phosphoprotein.	Involved in the modulation of the chemotaxis syste; catalyzes the demethylation of specific methylglutamate residues introduced into the chemoreceptors (methyl-accepting chemotaxis proteins) by CheR; Contains 1 cheB-type methylesterase domain; Contains 1 response regulatory domain.	726	319967..320692
		CACC109_00542		S:COG0840	K03406	Methyl-accepting chemotaxis protein McpC	Cell membrane; Chemotaxis; Membrane; Methylation; Transducer; Transmembrane; Transmembrane helix.	Chemotactic-signal transducers respond to changes in the concentration of attractants and repellents in the environment, transduce a signal from the outside to the inside of the cell, and facilitate sensory adaptation through the variation of the level of methylation. All amino acids serve as attractants in B.subtilis, they appear to cause an increase in the turnover methyl groups, leading to met…	2019	495073..497091
		CACC109_00799		T:COG3279	K02477	Chemotaxis response regulator protein-glutamate methylesterase	Chemotaxis; Cytoplasm; Hydrolase; Phosphoprotein.	Involved in the modulation of the chemotaxis syste; catalyzes the demethylation of specific methylglutamate residues introduced into the chemoreceptors (methyl-accepting chemotaxis proteins) by CheR; Contains 1 cheB-type methylesterase domain; Contains 1 response regulatory domain.	741	746158..746898
		CACC109_01091		T:COG5001	K03406	Methyl-accepting chemotaxis protein CtpH	Cell inner membrane; Cell membrane; Chemotaxis; Membrane; Methylation; Transducer; Transmembrane; Transmembrane helix.	Chemotactic-signal transducers respond to changes in the concentration of attractants and repellents in the environment, transduce a signal from the outside to the inside of the cell, and facilitate sensory adaptation through the variation of the level of methylation. Chemoreceptor for inorganic phosphate, which is required for taxis at high concentrations of phosphate; Contains 1 HAMP domain; Co…	2532	1050752..1053283
		CACC109_01212		S:COG0840	K03406	Methyl-accepting chemotaxis protein	Cell membrane; Chemotaxis; Membrane; Methylation; Transducer; Transmembrane; Transmembrane helix.	Chemotactic-signal transducers respond to changes in the concentration of attractants and repellents in the environment, transduce a signal from the outside to the inside of the cell, and facilitate sensory adaptation through the variation of the level of methylation; Contains 1 HAMP domain; Contains 1 methyl-accepting transducer domain.	1245	1188654..1189898
		CACC109_01327		T:COG0784|NT:COG0835	K03415	Chemotaxis protein CheV	Chemotaxis; Phosphoprotein.	Involved in the transmission of sensory signals from the chemoreceptors to the flagellar motors. Chemotaxis involves both a phosphorylation-dependent excitation and a methylation-dependent adaptation. CheV and CheW are involved in the coupling of the methyl-accepting chemoreceptors to the central two-component kinase Che; they are both necessary for efficient chemotaxis. Moreover, CheA-dependent …	906	1307791..1308696
		CACC109_01449		T:COG2197	K07689	Chemotaxis response regulator protein-glutamate methylesterase	Chemotaxis; Cytoplasm; Hydrolase; Phosphoprotein.	Involved in the modulation of the chemotaxis syste; catalyzes the demethylation of specific methylglutamate residues introduced into the chemoreceptors (methyl-accepting chemotaxis proteins) by CheR; Contains 1 cheB-type methylesterase domain; Contains 1 response regulatory domain.	627	1421747..1422373
		CACC109_01499		T:COG2197	K07693	Chemotaxis response regulator protein-glutamate methylesterase	Chemotaxis; Cytoplasm; Hydrolase; Phosphoprotein.	Involved in the modulation of the chemotaxis syste; catalyzes the demethylation of specific methylglutamate residues introduced into the chemoreceptors (methyl-accepting chemotaxis proteins) by CheR; Contains 1 cheB-type methylesterase domain; Contains 1 response regulatory domain.	603	complement(1475186..1475788)
		CACC109_01544	cheA	T:ENOG410XNMH	K03407	Histidine kinase	ATP-binding; Cell membrane; Herbicide resistance; Kinase; Membrane; Nucleotide-binding; Phosphoprotein; Transferase; Transmembrane; Transmembrane helix; Two-component regulatory system.	Contains 1 HAMP domain; Contains 1 histidine kinase domain; Contains 1 PAS (PER-ARNT-SIM) domain.; KEGG: bmq:BMQ_1545 two-component system, chemotaxis family, sensor kinase CheA	2754	1521252..1524005
		CACC109_01545	cheR	T:ENOG410XNMH	K00575	Protein-glutamate O-methyltransferase	Methyltransferase; S-adenosyl-L-methionine; Transferase.	Contains 1 cheR-type methyltransferase domain.; KEGG: bmq:BMQ_1546 chemotaxis protein methyltransferase CheR	855	1524024..1524878
		CACC109_02031		N:COG1291	K02556	Motility protein	Cell membrane; Chemotaxis; Flagellar rotation; Hydrogen ion transport; Ion transport; Membrane; Transmembrane; Transmembrane helix; Transport.	MotA and MotB comprise the stator element of the flagellar motor complex. Required for rotation of the flagellar motor. Probable transmembrane proton channel (By similarity); Belongs to the MotA family.	795	1986014..1986808
		CACC109_02032		N:COG1360	K02557	Motility protein	Cell membrane; Chemotaxis; Flagellar rotation; Membrane; Transmembrane; Transmembrane helix.	MotA and MotB comprise the stator element of the flagellar motor complex. Required for the rotation of the flagellar motor. Might be a linker that fastens the torque- generating machinery to the cell wall (By similarity); Belongs to the MotB family; Contains 1 OmpA-like domain.	834	1986801..1987634
		CACC109_02343	cheBR	T:COG2201|NT:COG1352	K13924	Protein-glutamate O-methyltransferase	Chemotaxis; Cytoplasm; Hydrolase; Phosphoprotein.	Involved in the modulation of the chemotaxis syste; catalyzes the demethylation of specific methylglutamate residues introduced into the chemoreceptors (methyl-accepting chemotaxis proteins) by CheR; Contains 1 cheB-type methylesterase domain; Contains 1 response regulatory domain.; KEGG: bmq:BMQ_2286 two-component system, chemotaxis family, CheB/CheR fusion protein	3561	complement(2288971..2292531)
		CACC109_02545		S:COG0840	K03406	Methyl-accepting chemotaxis protein TlpB	Cell membrane; Chemotaxis; Membrane; Methylation; Transducer; Transmembrane; Transmembrane helix.	Chemotactic-signal transducers respond to changes in the concentration of attractants and repellents in the environment, transduce a signal from the outside to the inside of the cell, and facilitate sensory adaptation through the variation of the level of methylation. All amino acids serve as attractants in B.subtilis, they appear to cause an increase in the turnover methyl groups, leading to met…	1983	complement(2478660..2480642)
		CACC109_02566		T:COG0745	K03413	Chemotaxis protein CheY	Chemotaxis; Cytoplasm; Phosphoprotein; Two-component regulatory system.	Involved in the transmission of sensory signals from the chemoreceptors and photoreceptors to the flagellar motors; Contains 1 response regulatory domain.	687	complement(2500152..2500838)
		CACC109_02778		T:COG2197	K07685	Chemotaxis response regulator protein-glutamate methylesterase	Chemotaxis; Cytoplasm; Hydrolase; Phosphoprotein.	Involved in the modulation of the chemotaxis syste; catalyzes the demethylation of specific methylglutamate residues introduced into the chemoreceptors (methyl-accepting chemotaxis proteins) by CheR; Contains 1 cheB-type methylesterase domain; Contains 1 response regulatory domain.	672	complement(2687521..2688192)
		CACC109_03362		T:COG2197	K07685	Chemotaxis response regulator protein-glutamate methylesterase of group 2 operon	Chemotaxis; Cytoplasm; Hydrolase; Phosphoprotein.	Involved in the modulation of the chemotaxis syste; catalyzes the demethylation of specific methylglutamate residues introduced into the chemoreceptors (methyl-accepting chemotaxis proteins) by CheR; Contains 1 cheB-type methylesterase domain; Contains 1 response regulatory domain.	642	3218229..3218870
		CACC109_03602		S:ENOG4111G1M	K03406	Methyl-accepting chemotaxis protein NahY	Cell inner membrane; Cell membrane; Chemotaxis; Membrane; Methylation; Plasmid; Transducer; Transmembrane; Transmembrane helix.	Chemotactic-signal transducers respond to changes in the concentration of attractants and repellents in the environment, transduce a signal from the outside to the inside of the cell, and facilitate sensory adaptation through the variation of the level of methylation. Chemoreceptor for naphthalene or a related compound. May facilitate biodegradation; Contains 1 HAMP domain; Contains 1 methyl-acce…	1512	complement(3422651..3424162)
		CACC109_04094		T:ENOG410XNMH	K03406	Probable methyl-accepting chemotaxis protein	Cell membrane; Chemotaxis; Membrane; Methylation; Transducer; Transmembrane; Transmembrane helix.	Chemotactic-signal transducers respond to changes in the concentration of attractants and repellents in the environment, transduce a signal from the outside to the inside of the cell, and facilitate sensory adaptation through the variation of the level of methylation; Contains 1 HAMP domain; Contains 1 methyl-accepting transducer domain.	1617	complement(3867438..3869054)
		CACC109_04209		K:COG1191	K02405	RNA polymerase sigma-D factor	DNA-binding; Sigma factor; Transcription; Transcription regulation.	Sigma factors are initiation factors that promote the attachment of RNA polymerase to specific initiation sites and are then released. This alternative sigma factor is required for the transcription of the flagellin and motility genes as well as for wild-type chemotaxis. Belongs to the sigma-70 factor family.	762	complement(3995166..3995927)
		CACC109_04210	cheD	NT:COG1871	K03411	Protein-glutamine glutaminase	Chemotaxis; Hydrolase.	Probably deamidates glutamine residues to glutamate on methyl-accepting chemotaxis receptors (MCPs), playing an important role in chemotaxis; Belongs to the CheD family.; KEGG: bmq:BMQ_4168 chemotaxis protein CheD	495	complement(3995984..3996478)
		CACC109_04211		NT:COG0835	K03408	Chemotaxis protein CheW	Chemotaxis; Cytoplasm.	Involved in the transmission of sensory signals from the chemoreceptors to the flagellar motors; Contains 1 cheW-like domain.	429	complement(3996529..3996957)
		CACC109_04212	cheA	T:COG0643	K03407	Histidine kinase	ATP-binding; Chemotaxis; Kinase; Membrane; Nucleotide-binding; Phosphoprotein; Transferase; Two-component regulatory system.	Involved in the transmission of sensory signals from the chemoreceptors to the flagellar motors. CheA is autophosphorylate; it can transfer its phosphate group to CheB, CheY or CheV; Contains 1 cheW-like domain; Contains 1 histidine kinase domain; Contains 1 HPt domain.; KEGG: xcc:XCC2700 two-component system, chemotaxis family, sensor kinase CheA	1980	complement(3996988..3998967)
		CACC109_04213	cheB	T:ENOG4111FNH	K03412	Protein-glutamate methylesterase	Chemotaxis; Cytoplasm; Hydrolase; Phosphoprotein.	Involved in the modulation of the chemotaxis syste; catalyzes the demethylation of specific methylglutamate residues introduced into the chemoreceptors (methyl-accepting chemotaxis proteins) by CheR; Contains 1 cheB-type methylesterase domain; Contains 1 response regulatory domain.; KEGG: pfe:PSF113_3563 two-component system, chemotaxis family, protein-glutamate methylesterase/glutaminase	1044	complement(3998982..4000025)
		CACC109_04223		N:COG1776|N:COG1886	K02417	Flagellar motor switch phosphatase FliY	Cell membrane; Chemotaxis; Flagellar rotation; Hydrolase; Membrane.	Component of the flagellar switch. Binds CheY-P and increases its hydrolysis rate in vitro. May function constitutively to remove CheY-P around the flagellar switch to maintain an optimal level of CheY-P whereas CheC may function after addition of an attractant to cope with increased levels of CheY-P; Belongs to the FliN/MopA/SpaO family.	1131	complement(4007955..4009085)
		CACC109_04224		N:COG1868	K02416	Flagellar motor switch protein FliM	Bacterial flagellum; Cell membrane; Chemotaxis; Flagellar rotation; Membrane.	One of the proteins that forms a switch complex that is proposed to be located at the base of the basal body. This complex interacts with chemotaxis proteins (such as CheY) in addition to contacting components of the motor that determine the direction of flagellar rotation. Belongs to the FliM family.	1002	complement(4009075..4010076)
		CACC109_04225		N:COG1580	K02415	Flagellar protein FliL	Cell membrane; Chemotaxis; Flagellar rotation; Membrane; Transmembrane; Transmembrane helix.	Controls the rotational direction of flagella during chemotaxis. Belongs to the FliL family.	432	complement(4010097..4010528)
		CACC109_04231		N:COG2882	K02413	Flagellar FliJ protein	Bacterial flagellum biogenesis; Bacterial flagellum protein export; Cell membrane; Chemotaxis; Membrane; Protein transport; Transport.	Flagellar protein that affects chemotactic events; Belongs to the FliJ family.	444	complement(4015313..4015756)
		CACC109_04234		N:COG1536	K02410	Flagellar motor switch protein FliG	Bacterial flagellum; Cell membrane; Chemotaxis; Flagellar rotation; Membrane.	One of the proteins that forms a switch complex that is proposed to be located at the base of the basal body. This complex interacts with chemotaxis proteins (such as CheY) in addition to contacting components of the motor that determine the direction of flagellar rotation. Belongs to the FliG family.	1020	complement(4017828..4018847)
		CACC109_04370	cheR	T:ENOG410XNMH	K00575	Protein-glutamate O-methyltransferase	Methyltransferase; S-adenosyl-L-methionine; Transferase.	Methylation of the membrane-bound methyl-accepting chemotaxis proteins (MCP) to form gamma-glutamyl methyl ester residues in MCP; Contains 1 cheR-type methyltransferase domain.; KEGG: bmq:BMQ_4326 chemotaxis protein methyltransferase CheR	783	complement(4154990..4155772)
		CACC109_05168		T:COG2197	K14979	Chemotaxis response regulator protein-glutamate methylesterase	Chemotaxis; Cytoplasm; Hydrolase; Phosphoprotein.	Involved in the modulation of the chemotaxis syste; catalyzes the demethylation of specific methylglutamate residues introduced into the chemoreceptors (methyl-accepting chemotaxis proteins) by CheR; Contains 1 cheB-type methylesterase domain; Contains 1 response regulatory domain.	684	complement(4908890..4909573)
		CACC109_01327		T:COG0784|NT:COG0835	K03415	Chemotaxis protein CheV	Chemotaxis; Phosphoprotein.	Involved in the transmission of sensory signals from the chemoreceptors to the flagellar motors. Chemotaxis involves both a phosphorylation-dependent excitation and a methylation-dependent adaptation. CheV and CheW are involved in the coupling of the methyl-accepting chemoreceptors to the central two-component kinase Che; they are both necessary for efficient chemotaxis. Moreover, CheA-dependent …	906	1307791..1308696
		CACC109_02031		N:COG1291	K02556	Motility protein	Cell membrane; Chemotaxis; Flagellar rotation; Hydrogen ion transport; Ion transport; Membrane; Transmembrane; Transmembrane helix; Transport.	MotA and MotB comprise the stator element of the flagellar motor complex. Required for rotation of the flagellar motor. Probable transmembrane proton channel (By similarity); Belongs to the MotA family.	795	1986014..1986808
		CACC109_02032		N:COG1360	K02557	Motility protein	Cell membrane; Chemotaxis; Flagellar rotation; Membrane; Transmembrane; Transmembrane helix.	MotA and MotB comprise the stator element of the flagellar motor complex. Required for the rotation of the flagellar motor. Might be a linker that fastens the torque- generating machinery to the cell wall (By similarity); Belongs to the MotB family; Contains 1 OmpA-like domain.	834	1986801..1987634
		CACC109_02566		T:COG0745	K03413	Chemotaxis protein CheY	Chemotaxis; Cytoplasm; Phosphoprotein; Two-component regulatory system.	Involved in the transmission of sensory signals from the chemoreceptors and photoreceptors to the flagellar motors; Contains 1 response regulatory domain.	687	complement(2500152..2500838)
		CACC109_04211		NT:COG0835	K03408	Chemotaxis protein CheW	Chemotaxis; Cytoplasm.	Involved in the transmission of sensory signals from the chemoreceptors to the flagellar motors; Contains 1 cheW-like domain.	429	complement(3996529..3996957)
		CACC109_04212	cheA	T:COG0643	K03407	Histidine kinase	ATP-binding; Chemotaxis; Kinase; Membrane; Nucleotide-binding; Phosphoprotein; Transferase; Two-component regulatory system.	Involved in the transmission of sensory signals from the chemoreceptors to the flagellar motors. CheA is autophosphorylate; it can transfer its phosphate group to CheB, CheY or CheV; Contains 1 cheW-like domain; Contains 1 histidine kinase domain; Contains 1 HPt domain.; KEGG: xcc:XCC2700 two-component system, chemotaxis family, sensor kinase CheA	1980	complement(3996988..3998967)
		CACC109_04215		N:COG1419	K02404	Flagellar biosynthesis protein FlhF	Bacterial flagellum biogenesis; Bacterial flagellum protein export; Cell membrane; GTP-binding; Membrane; Nucleotide-binding; Protein transport; Transport.	Necessary for flagellar biosynthesis. May be involved in translocation of the flagellum. Belongs to the GTP-binding SRP family.	1098	complement(4000897..4001994)
		CACC109_04216		N:COG1298	K02400	Flagellar biosynthesis protein FlhA	Bacterial flagellum biogenesis; Bacterial flagellum protein export; Cell membrane; Membrane; Protein transport; Transmembrane; Transmembrane helix; Transport.	Involved in the export of flagellum proteins. Belongs to the FHIPEP (flagella/HR/invasion proteins export pore) family.	2037	complement(4001994..4004030)
		CACC109_04217		N:COG1377	K02401	Flagellar biosynthetic protein FlhB	Bacterial flagellum biogenesis; Bacterial flagellum protein export; Cell membrane; Membrane; Protein transport; Transmembrane; Transmembrane helix; Transport.	May be involved in the export of flagellum proteins. Belongs to the type III secretion exporter family.	1083	complement(4004061..4005143)
		CACC109_04218		N:COG1684	K02421	Flagellar biosynthetic protein FliR	Bacterial flagellum; Cell membrane; Membrane; Transmembrane; Transmembrane helix.	Role in flagellar biosynthesis. Belongs to the FliR/MopE/SpaR family.	777	complement(4005146..4005922)
		CACC109_04219		N:COG1987	K02420	Flagellar biosynthetic protein FliQ	Bacterial flagellum; Cell membrane; Membrane; Transmembrane; Transmembrane helix.	Role in flagellar biosynthesis. Belongs to the FliQ/MopD/SpaQ family.	270	complement(4005925..4006194)
		CACC109_04220		N:COG1338	K02419	Flagellar biosynthetic protein FliP	Bacterial flagellum biogenesis; Bacterial flagellum protein export; Cell membrane; Membrane; Protein transport; Transmembrane; Transmembrane helix; Transport.	Plays a role in the flagellum-specific transport system; Belongs to the FliP/MopC/SpaP family.	669	complement(4006205..4006873)
		CACC109_04221		N:ENOG410XUNH	K02418	Flagellar biosynthetic protein FliZ	Bacterial flagellum biogenesis; Cell membrane; Membrane; Signal; Transmembrane; Transmembrane helix.		642	complement(4006866..4007507)
		CACC109_04223		N:COG1776|N:COG1886	K02417	Flagellar motor switch phosphatase FliY	Cell membrane; Chemotaxis; Flagellar rotation; Hydrolase; Membrane.	Component of the flagellar switch. Binds CheY-P and increases its hydrolysis rate in vitro. May function constitutively to remove CheY-P around the flagellar switch to maintain an optimal level of CheY-P whereas CheC may function after addition of an attractant to cope with increased levels of CheY-P; Belongs to the FliN/MopA/SpaO family.	1131	complement(4007955..4009085)
		CACC109_04224		N:COG1868	K02416	Flagellar motor switch protein FliM	Bacterial flagellum; Cell membrane; Chemotaxis; Flagellar rotation; Membrane.	One of the proteins that forms a switch complex that is proposed to be located at the base of the basal body. This complex interacts with chemotaxis proteins (such as CheY) in addition to contacting components of the motor that determine the direction of flagellar rotation. Belongs to the FliM family.	1002	complement(4009075..4010076)
		CACC109_04225		N:COG1580	K02415	Flagellar protein FliL	Cell membrane; Chemotaxis; Flagellar rotation; Membrane; Transmembrane; Transmembrane helix.	Controls the rotational direction of flagella during chemotaxis. Belongs to the FliL family.	432	complement(4010097..4010528)
		CACC109_04227		N:COG4786	K02390	Flagellar hook protein FlgE	Bacterial flagellum.	Belongs to the flagella basal body rod proteins family.	795	complement(4010777..4011571)
		CACC109_04231		N:COG2882	K02413	Flagellar FliJ protein	Bacterial flagellum biogenesis; Bacterial flagellum protein export; Cell membrane; Chemotaxis; Membrane; Protein transport; Transport.	Flagellar protein that affects chemotactic events; Belongs to the FliJ family.	444	complement(4015313..4015756)
		CACC109_04233		N:COG1317	K02411	Probable flagellar assembly protein FliH	Bacterial flagellum biogenesis; Bacterial flagellum protein export; Protein transport; Transport.	Needed for flagellar regrowth and assembly. Belongs to the FliH family.	789	complement(4017047..4017835)
		CACC109_04234		N:COG1536	K02410	Flagellar motor switch protein FliG	Bacterial flagellum; Cell membrane; Chemotaxis; Flagellar rotation; Membrane.	One of the proteins that forms a switch complex that is proposed to be located at the base of the basal body. This complex interacts with chemotaxis proteins (such as CheY) in addition to contacting components of the motor that determine the direction of flagellar rotation. Belongs to the FliG family.	1020	complement(4017828..4018847)
		CACC109_04235		N:COG1766	K02409	Flagellar M-ring protein	Bacterial flagellum; Cell membrane; Membrane; Transmembrane; Transmembrane helix.	The M ring may be actively involved in energy transduction. Belongs to the FliF family.	1593	complement(4018859..4020451)
		CACC109_04236		N:COG1677	K02408	Flagellar hook-basal body complex protein FliE	Bacterial flagellum.	Belongs to the FliE family.	291	complement(4020501..4020791)
		CACC109_04237		N:COG1558	K02388	Flagellar basal-body rod protein FlgC	Bacterial flagellum.	Belongs to the flagella basal body rod proteins family.	450	complement(4020804..4021253)
		CACC109_04238		N:COG1815	K02387	Flagellar basal body rod protein FlgB	Bacterial flagellum.	Structural component of flagellum, the bacterial motility apparatus. Part of the rod structure of flagellar basal body; Belongs to the flagella basal body rod proteins family.	390	complement(4021256..4021645)
		CACC109_05145		N:ENOG410XZCW	K02423	Flagellar protein FliT	Bacterial flagellum biogenesis; Chaperone; Coiled coil; Cytoplasm.	May act as an export chaperone for the filament capping protein FliD; Belongs to the bacillales FliT family.	402	complement(4887358..4887759)
		CACC109_05146		N:COG1516	K02422	Flagellar protein FliS	Bacterial flagellum biogenesis; Cytoplasm.	Belongs to the FliS family.	402	complement(4887699..4888100)
		CACC109_05147		N:COG1345	K02407	Flagellar hook-associated protein	Bacterial flagellum; Coiled coil; Secreted.	Required for the morphogenesis and for the elongation of the flagellar filament by facilitating polymerization of the flagellin monomers at the tip of growing filament. Forms a capping structure, which prevents flagellin subunits (transported through the central channel of the flagellum) from leaking out without polymerization at the distal end (By similarity); Belongs to the FliD family.	1800	complement(4888117..4889916)
		CACC109_05155		S:COG1699	K13626	Flagellar assembly factor FliW	Bacterial flagellum biogenesis; Cytoplasm.	Binds to the C-terminal region of flagellin, which is implicated in polymerization, and participates in the assembly of the flagellum; Belongs to the FliW family.	423	complement(4898701..4899123)
		CACC109_05158		N:COG1344	K02397	Flagellar hook-associated protein	Bacterial flagellum; Secreted.	Belongs to the bacterial flagellin family.	882	complement(4900495..4901376)
		CACC109_05159		N:COG1256	K02396	Flagellar hook-associated protein	Bacterial flagellum; Secreted.	Belongs to the flagella basal body rod proteins family.	1524	complement(4901379..4902902)
		CACC109_05186		N:COG4786	K02392	Flagellar hook-basal body complex protein FlhP	Bacterial flagellum biogenesis; Coiled coil.	Belongs to the flagella basal body rod proteins family.	822	complement(4928541..4929362)
		CACC109_05187		N:COG4786	K02392	Flagellar hook-basal body complex protein FlhO	Bacterial flagellum biogenesis.	Not required for motility. Belongs to the flagella basal body rod proteins family.	825	complement(4929386..4930210)
	CACC119	CACC119_05838		T:COG3279	K02477	Chemotaxis response regulator protein-glutamate methylesterase of group 1 operon	Chemotaxis; Cytoplasm; Hydrolase; Phosphoprotein.	Involved in the modulation of the chemotaxis syste; catalyzes the demethylation of specific methylglutamate residues introduced into the chemoreceptors (methyl-accepting chemotaxis proteins) by CheR; Contains 1 cheB-type methylesterase domain; Contains 1 response regulatory domain.	609	81240..81848
		CACC119_00216		S:COG0840	K03406	Methyl-accepting chemotaxis protein TlpB	Cell membrane; Chemotaxis; Membrane; Methylation; Transducer; Transmembrane; Transmembrane helix.	Chemotactic-signal transducers respond to changes in the concentration of attractants and repellents in the environment, transduce a signal from the outside to the inside of the cell, and facilitate sensory adaptation through the variation of the level of methylation. All amino acids serve as attractants in B.subtilis, they appear to cause an increase in the turnover methyl groups, leading to met…	1983	complement(97386..99368)
		CACC119_05727		T:COG3279	K02477	Chemotaxis response regulator protein-glutamate methylesterase	Chemotaxis; Cytoplasm; Hydrolase; Phosphoprotein.	Involved in the modulation of the chemotaxis syste; catalyzes the demethylation of specific methylglutamate residues introduced into the chemoreceptors (methyl-accepting chemotaxis proteins) by CheR; Contains 1 cheB-type methylesterase domain; Contains 1 response regulatory domain.	636	complement(99366..100001)
		CACC119_05738		T:COG0784	K07684	Chemotaxis response regulator protein-glutamate methylesterase	Chemotaxis; Cytoplasm; Hydrolase; Phosphoprotein.	Involved in the modulation of the chemotaxis syste; catalyzes the demethylation of specific methylglutamate residues introduced into the chemoreceptors (methyl-accepting chemotaxis proteins) by CheR; Contains 1 cheB-type methylesterase domain; Contains 1 response regulatory domain.	645	complement(113768..114412)
		CACC119_05371		T:COG2197	K14979	Chemotaxis response regulator protein-glutamate methylesterase	Chemotaxis; Cytoplasm; Hydrolase; Phosphoprotein.	Involved in the modulation of the chemotaxis syste; catalyzes the demethylation of specific methylglutamate residues introduced into the chemoreceptors (methyl-accepting chemotaxis proteins) by CheR; Contains 1 cheB-type methylesterase domain; Contains 1 response regulatory domain.	684	complement(239432..240115)
		CACC119_00402		T:COG2197	K07696	Chemotaxis response regulator protein-glutamate methylesterase	Chemotaxis; Cytoplasm; Hydrolase; Phosphoprotein.	Involved in the modulation of the chemotaxis syste; catalyzes the demethylation of specific methylglutamate residues introduced into the chemoreceptors (methyl-accepting chemotaxis proteins) by CheR; Contains 1 cheB-type methylesterase domain; Contains 1 response regulatory domain.	690	complement(275529..276218)
		CACC119_01045		T:COG2197	K07685	Chemotaxis response regulator protein-glutamate methylesterase of group 2 operon	Chemotaxis; Cytoplasm; Hydrolase; Phosphoprotein.	Involved in the modulation of the chemotaxis syste; catalyzes the demethylation of specific methylglutamate residues introduced into the chemoreceptors (methyl-accepting chemotaxis proteins) by CheR; Contains 1 cheB-type methylesterase domain; Contains 1 response regulatory domain.	642	860953..861594
		CACC119_01261		S:ENOG4111G1M	K03406	Methyl-accepting chemotaxis protein NahY	Cell inner membrane; Cell membrane; Chemotaxis; Membrane; Methylation; Plasmid; Transducer; Transmembrane; Transmembrane helix.	Chemotactic-signal transducers respond to changes in the concentration of attractants and repellents in the environment, transduce a signal from the outside to the inside of the cell, and facilitate sensory adaptation through the variation of the level of methylation. Chemoreceptor for naphthalene or a related compound. May facilitate biodegradation; Contains 1 HAMP domain; Contains 1 methyl-acce…	1512	complement(1034127..1035638)
		CACC119_01443		T:COG3707	K07690	Chemotaxis protein CheY	Chemotaxis; Cytoplasm; Flagellar rotation; Magnesium; Metal-binding; Phosphoprotein; Two-component regulatory system.	Involved in the transmission of sensory signals from the chemoreceptors to the flagellar motors. CheY seems to regulate the clockwise (CW) rotation (By similarity); Contains 1 response regulatory domain.	573	complement(1195578..1196150)
		CACC119_01806		T:ENOG410XNMH	K03406	Probable methyl-accepting chemotaxis protein	Cell membrane; Chemotaxis; Membrane; Methylation; Transducer; Transmembrane; Transmembrane helix.	Chemotactic-signal transducers respond to changes in the concentration of attractants and repellents in the environment, transduce a signal from the outside to the inside of the cell, and facilitate sensory adaptation through the variation of the level of methylation; Contains 1 HAMP domain; Contains 1 methyl-accepting transducer domain.	1617	complement(1523730..1525346)
		CACC119_01918		K:COG1191	K02405	RNA polymerase sigma-D factor	DNA-binding; Sigma factor; Transcription; Transcription regulation.	Sigma factors are initiation factors that promote the attachment of RNA polymerase to specific initiation sites and are then released. This alternative sigma factor is required for the transcription of the flagellin and motility genes as well as for wild-type chemotaxis. Belongs to the sigma-70 factor family.	762	complement(1648480..1649241)
		CACC119_01919	cheD	NT:COG1871	K03411	Protein-glutamine glutaminase	Chemotaxis; Hydrolase.	Probably deamidates glutamine residues to glutamate on methyl-accepting chemotaxis receptors (MCPs), playing an important role in chemotaxis; Belongs to the CheD family.; KEGG: bmq:BMQ_4168 chemotaxis protein CheD	495	complement(1649291..1649785)
		CACC119_01920		NT:COG0835	K03408	Chemotaxis protein CheW	Chemotaxis; Cytoplasm.	Involved in the transmission of sensory signals from the chemoreceptors to the flagellar motors; Contains 1 cheW-like domain.	429	complement(1649836..1650264)
		CACC119_01921	cheA	T:COG0643	K03407	Histidine kinase	ATP-binding; Chemotaxis; Kinase; Membrane; Nucleotide-binding; Phosphoprotein; Transferase; Two-component regulatory system.	Involved in the transmission of sensory signals from the chemoreceptors to the flagellar motors. CheA is autophosphorylate; it can transfer its phosphate group to CheB, CheY or CheV; Contains 1 cheW-like domain; Contains 1 histidine kinase domain; Contains 1 HPt domain.; KEGG: xcc:XCC2700 two-component system, chemotaxis family, sensor kinase CheA	1980	complement(1650295..1652274)
		CACC119_01922	cheB	T:ENOG4111FNH	K03412	Protein-glutamate methylesterase	Chemotaxis; Cytoplasm; Hydrolase; Phosphoprotein.	Involved in the modulation of the chemotaxis syste; catalyzes the demethylation of specific methylglutamate residues introduced into the chemoreceptors (methyl-accepting chemotaxis proteins) by CheR; Contains 1 cheB-type methylesterase domain; Contains 1 response regulatory domain.; KEGG: pfe:PSF113_3563 two-component system, chemotaxis family, protein-glutamate methylesterase/glutaminase	1044	complement(1652289..1653332)
		CACC119_01932		N:COG1776|N:COG1886	K02417	Flagellar motor switch phosphatase FliY	Cell membrane; Chemotaxis; Flagellar rotation; Hydrolase; Membrane.	Component of the flagellar switch. Binds CheY-P and increases its hydrolysis rate in vitro. May function constitutively to remove CheY-P around the flagellar switch to maintain an optimal level of CheY-P whereas CheC may function after addition of an attractant to cope with increased levels of CheY-P; Belongs to the FliN/MopA/SpaO family.	1131	complement(1661256..1662386)
		CACC119_01933		N:COG1868	K02416	Flagellar motor switch protein FliM	Bacterial flagellum; Cell membrane; Chemotaxis; Flagellar rotation; Membrane.	One of the proteins that forms a switch complex that is proposed to be located at the base of the basal body. This complex interacts with chemotaxis proteins (such as CheY) in addition to contacting components of the motor that determine the direction of flagellar rotation. Belongs to the FliM family.	1002	complement(1662376..1663377)
		CACC119_01934		N:COG1580	K02415	Flagellar protein FliL	Cell membrane; Chemotaxis; Flagellar rotation; Membrane; Transmembrane; Transmembrane helix.	Controls the rotational direction of flagella during chemotaxis. Belongs to the FliL family.	432	complement(1663398..1663829)
		CACC119_01940		N:COG2882	K02413	Flagellar FliJ protein	Bacterial flagellum biogenesis; Bacterial flagellum protein export; Cell membrane; Chemotaxis; Membrane; Protein transport; Transport.	Flagellar protein that affects chemotactic events; Belongs to the FliJ family.	444	complement(1668488..1668931)
		CACC119_01943		N:COG1536	K02410	Flagellar motor switch protein FliG	Bacterial flagellum; Cell membrane; Chemotaxis; Flagellar rotation; Membrane.	One of the proteins that forms a switch complex that is proposed to be located at the base of the basal body. This complex interacts with chemotaxis proteins (such as CheY) in addition to contacting components of the motor that determine the direction of flagellar rotation. Belongs to the FliG family.	1020	complement(1671003..1672022)
		CACC119_02078	cheR	T:ENOG410XNMH	K00575	Protein-glutamate O-methyltransferase	Methyltransferase; S-adenosyl-L-methionine; Transferase.	Methylation of the membrane-bound methyl-accepting chemotaxis proteins (MCP) to form gamma-glutamyl methyl ester residues in MCP; Contains 1 cheR-type methyltransferase domain.; KEGG: bmq:BMQ_4326 chemotaxis protein methyltransferase CheR	783	complement(1808419..1809201)
		CACC119_02984		T:COG4565	K07702	Chemotaxis response regulator protein-glutamate methylesterase	Chemotaxis; Cytoplasm; Hydrolase; Phosphoprotein.	Involved in the modulation of the chemotaxis syste; catalyzes the demethylation of specific methylglutamate residues introduced into the chemoreceptors (methyl-accepting chemotaxis proteins) by CheR; Contains 1 cheB-type methylesterase domain; Contains 1 response regulatory domain.	726	2655452..2656177
		CACC119_03190		S:COG0840	K03406	Methyl-accepting chemotaxis protein McpC	Cell membrane; Chemotaxis; Membrane; Methylation; Transducer; Transmembrane; Transmembrane helix.	Chemotactic-signal transducers respond to changes in the concentration of attractants and repellents in the environment, transduce a signal from the outside to the inside of the cell, and facilitate sensory adaptation through the variation of the level of methylation. All amino acids serve as attractants in B.subtilis, they appear to cause an increase in the turnover methyl groups, leading to met…	2019	2852663..2854681
		CACC119_03272	yesM	T:COG2972	K07718	Histidine kinase	Cell membrane; Chemotaxis; Membrane; Methylation; Transducer; Transmembrane; Transmembrane helix.	Chemotactic-signal transducers respond to changes in the concentration of attractants and repellents in the environment, transduce a signal from the outside to the inside of the cell, and facilitate sensory adaptation through the variation of the level of methylation. All amino acids serve as attractants in B.subtilis, they appear to cause an increase in the turnover methyl groups, leading to met…	1821	2933594..2935414
		CACC119_03444		T:COG3279	K02477	Chemotaxis response regulator protein-glutamate methylesterase	Chemotaxis; Cytoplasm; Hydrolase; Phosphoprotein.	Involved in the modulation of the chemotaxis syste; catalyzes the demethylation of specific methylglutamate residues introduced into the chemoreceptors (methyl-accepting chemotaxis proteins) by CheR; Contains 1 cheB-type methylesterase domain; Contains 1 response regulatory domain.	741	3101600..3102340
		CACC119_03846		S:COG0840	K03406	Methyl-accepting chemotaxis protein	Cell membrane; Chemotaxis; Membrane; Methylation; Transducer; Transmembrane; Transmembrane helix.	Chemotactic-signal transducers respond to changes in the concentration of attractants and repellents in the environment, transduce a signal from the outside to the inside of the cell, and facilitate sensory adaptation through the variation of the level of methylation; Contains 1 HAMP domain; Contains 1 methyl-accepting transducer domain.	1245	3525483..3526727
		CACC119_03960		T:COG0784|NT:COG0835	K03415	Chemotaxis protein CheV	Chemotaxis; Phosphoprotein.	Involved in the transmission of sensory signals from the chemoreceptors to the flagellar motors. Chemotaxis involves both a phosphorylation-dependent excitation and a methylation-dependent adaptation. CheV and CheW are involved in the coupling of the methyl-accepting chemoreceptors to the central two-component kinase Che; they are both necessary for efficient chemotaxis. Moreover, CheA-dependent …	906	3644588..3645493
		CACC119_04083		T:COG2197	K07689	Chemotaxis response regulator protein-glutamate methylesterase	Chemotaxis; Cytoplasm; Hydrolase; Phosphoprotein.	Involved in the modulation of the chemotaxis syste; catalyzes the demethylation of specific methylglutamate residues introduced into the chemoreceptors (methyl-accepting chemotaxis proteins) by CheR; Contains 1 cheB-type methylesterase domain; Contains 1 response regulatory domain.	627	3758038..3758664
		CACC119_04140		T:COG2197	K07693	Chemotaxis response regulator protein-glutamate methylesterase	Chemotaxis; Cytoplasm; Hydrolase; Phosphoprotein.	Involved in the modulation of the chemotaxis syste; catalyzes the demethylation of specific methylglutamate residues introduced into the chemoreceptors (methyl-accepting chemotaxis proteins) by CheR; Contains 1 cheB-type methylesterase domain; Contains 1 response regulatory domain.	603	complement(3817276..3817878)
		CACC119_04257	cheA	T:ENOG410XNMH	K03407	Histidine kinase	ATP-binding; Cell membrane; Herbicide resistance; Kinase; Membrane; Nucleotide-binding; Phosphoprotein; Transferase; Transmembrane; Transmembrane helix; Two-component regulatory system.	Contains 1 HAMP domain; Contains 1 histidine kinase domain; Contains 1 PAS (PER-ARNT-SIM) domain.; KEGG: bmq:BMQ_1545 two-component system, chemotaxis family, sensor kinase CheA	2754	3927971..3930724
		CACC119_04258	cheR	T:ENOG410XNMH	K00575	Protein-glutamate O-methyltransferase	Methyltransferase; S-adenosyl-L-methionine; Transferase.	Contains 1 cheR-type methyltransferase domain.; KEGG: bmq:BMQ_1546 chemotaxis protein methyltransferase CheR	855	3930743..3931597
		CACC119_04694		N:COG1291	K02556	Motility protein	Cell membrane; Chemotaxis; Flagellar rotation; Hydrogen ion transport; Ion transport; Membrane; Transmembrane; Transmembrane helix; Transport.	MotA and MotB comprise the stator element of the flagellar motor complex. Required for rotation of the flagellar motor. Probable transmembrane proton channel (By similarity); Belongs to the MotA family.	795	4359941..4360735
		CACC119_04695		N:COG1360	K02557	Motility protein	Cell membrane; Chemotaxis; Flagellar rotation; Membrane; Transmembrane; Transmembrane helix.	MotA and MotB comprise the stator element of the flagellar motor complex. Required for the rotation of the flagellar motor. Might be a linker that fastens the torque- generating machinery to the cell wall (By similarity); Belongs to the MotB family; Contains 1 OmpA-like domain.	834	4360728..4361561
		CACC119_04987	cheBR	T:COG2201|NT:COG1352	K13924	Protein-glutamate O-methyltransferase	Chemotaxis; Cytoplasm; Hydrolase; Phosphoprotein.	Involved in the modulation of the chemotaxis syste; catalyzes the demethylation of specific methylglutamate residues introduced into the chemoreceptors (methyl-accepting chemotaxis proteins) by CheR; Contains 1 cheB-type methylesterase domain; Contains 1 response regulatory domain.; KEGG: bmq:BMQ_2286 two-component system, chemotaxis family, CheB/CheR fusion protein	3561	complement(4643613..4647173)
		CACC119_05350		N:ENOG410XZCW	K02423	Flagellar protein FliT	Bacterial flagellum biogenesis; Chaperone; Cytoplasm.	May act as an export chaperone for the filament capping protein FliD; Belongs to the bacillales FliT family.	402	complement(219151..219552)
		CACC119_05351		N:COG1516	K02422	Flagellar protein FliS	Bacterial flagellum biogenesis; Cytoplasm.	Belongs to the FliS family.	402	complement(219492..219893)
		CACC119_05352		N:COG1345	K02407	Flagellar hook-associated protein	Bacterial flagellum; Coiled coil; Secreted.	Required for the morphogenesis and for the elongation of the flagellar filament by facilitating polymerization of the flagellin monomers at the tip of growing filament. Forms a capping structure, which prevents flagellin subunits (transported through the central channel of the flagellum) from leaking out without polymerization at the distal end (By similarity); Belongs to the FliD family.	1800	complement(219910..221709)
		CACC119_05360		S:COG1699	K13626	Flagellar assembly factor FliW	Bacterial flagellum biogenesis; Cytoplasm.	Binds to the C-terminal region of flagellin, which is implicated in polymerization, and participates in the assembly of the flagellum; Belongs to the FliW family.	423	complement(230496..230918)
		CACC119_05361		N:COG1344	K02397	Flagellar hook-associated protein	Bacterial flagellum; Secreted.	Belongs to the bacterial flagellin family.	882	complement(231000..231881)
		CACC119_05362		N:COG1256	K02396	Flagellar hook-associated protein	Bacterial flagellum; Secreted.	Belongs to the flagella basal body rod proteins family.	1524	complement(231884..233407)
		CACC119_05390		N:COG4786	K02392	Flagellar hook-basal body complex protein FlhP	Bacterial flagellum biogenesis; Coiled coil.	Belongs to the flagella basal body rod proteins family.	822	complement(259335..260156)
		CACC119_05391		N:COG4786	K02392	Flagellar hook-basal body complex protein FlhO	Bacterial flagellum biogenesis.	Not required for motility. Belongs to the flagella basal body rod proteins family.	825	complement(260180..261004)
		CACC119_01443		T:COG3707	K07690	Chemotaxis protein CheY	Chemotaxis; Cytoplasm; Flagellar rotation; Magnesium; Metal-binding; Phosphoprotein; Two-component regulatory system.	Involved in the transmission of sensory signals from the chemoreceptors to the flagellar motors. CheY seems to regulate the clockwise (CW) rotation (By similarity); Contains 1 response regulatory domain.	573	complement(1195578..1196150)
		CACC119_01920		NT:COG0835	K03408	Chemotaxis protein CheW	Chemotaxis; Cytoplasm.	Involved in the transmission of sensory signals from the chemoreceptors to the flagellar motors; Contains 1 cheW-like domain.	429	complement(1649836..1650264)
		CACC119_01921	cheA	T:COG0643	K03407	Histidine kinase	ATP-binding; Chemotaxis; Kinase; Membrane; Nucleotide-binding; Phosphoprotein; Transferase; Two-component regulatory system.	Involved in the transmission of sensory signals from the chemoreceptors to the flagellar motors. CheA is autophosphorylate; it can transfer its phosphate group to CheB, CheY or CheV; Contains 1 cheW-like domain; Contains 1 histidine kinase domain; Contains 1 HPt domain.; KEGG: xcc:XCC2700 two-component system, chemotaxis family, sensor kinase CheA	1980	complement(1650295..1652274)
		CACC119_01924		N:COG1419	K02404	Flagellar biosynthesis protein FlhF	Bacterial flagellum biogenesis; Bacterial flagellum protein export; Cell membrane; GTP-binding; Membrane; Nucleotide-binding; Protein transport; Transport.	Necessary for flagellar biosynthesis. May be involved in translocation of the flagellum. Belongs to the GTP-binding SRP family.	1098	complement(1654204..1655301)
		CACC119_01925		N:COG1298	K02400	Flagellar biosynthesis protein FlhA	Bacterial flagellum biogenesis; Bacterial flagellum protein export; Cell membrane; Membrane; Protein transport; Transmembrane; Transmembrane helix; Transport.	Involved in the export of flagellum proteins. Belongs to the FHIPEP (flagella/HR/invasion proteins export pore) family.	2031	complement(1655301..1657331)
		CACC119_01926		N:COG1377	K02401	Flagellar biosynthetic protein FlhB	Bacterial flagellum biogenesis; Bacterial flagellum protein export; Cell membrane; Membrane; Protein transport; Transmembrane; Transmembrane helix; Transport.	May be involved in the export of flagellum proteins. Belongs to the type III secretion exporter family.	1083	complement(1657362..1658444)
		CACC119_01927		N:COG1684	K02421	Flagellar biosynthetic protein FliR	Bacterial flagellum; Cell membrane; Membrane; Transmembrane; Transmembrane helix.	Role in flagellar biosynthesis. Belongs to the FliR/MopE/SpaR family.	777	complement(1658447..1659223)
		CACC119_01928		N:COG1987	K02420	Flagellar biosynthetic protein FliQ	Bacterial flagellum; Cell membrane; Membrane; Transmembrane; Transmembrane helix.	Role in flagellar biosynthesis. Belongs to the FliQ/MopD/SpaQ family.	270	complement(1659226..1659495)
		CACC119_01929		N:COG1338	K02419	Flagellar biosynthetic protein FliP	Bacterial flagellum biogenesis; Bacterial flagellum protein export; Cell membrane; Membrane; Protein transport; Transmembrane; Transmembrane helix; Transport.	Plays a role in the flagellum-specific transport system; Belongs to the FliP/MopC/SpaP family.	669	complement(1659506..1660174)
		CACC119_01930		N:ENOG410XUNH	K02418	Flagellar biosynthetic protein FliZ	Bacterial flagellum biogenesis; Cell membrane; Membrane; Signal; Transmembrane; Transmembrane helix.		642	complement(1660167..1660808)
		CACC119_01932		N:COG1776|N:COG1886	K02417	Flagellar motor switch phosphatase FliY	Cell membrane; Chemotaxis; Flagellar rotation; Hydrolase; Membrane.	Component of the flagellar switch. Binds CheY-P and increases its hydrolysis rate in vitro. May function constitutively to remove CheY-P around the flagellar switch to maintain an optimal level of CheY-P whereas CheC may function after addition of an attractant to cope with increased levels of CheY-P; Belongs to the FliN/MopA/SpaO family.	1131	complement(1661256..1662386)
		CACC119_01933		N:COG1868	K02416	Flagellar motor switch protein FliM	Bacterial flagellum; Cell membrane; Chemotaxis; Flagellar rotation; Membrane.	One of the proteins that forms a switch complex that is proposed to be located at the base of the basal body. This complex interacts with chemotaxis proteins (such as CheY) in addition to contacting components of the motor that determine the direction of flagellar rotation. Belongs to the FliM family.	1002	complement(1662376..1663377)
		CACC119_01934		N:COG1580	K02415	Flagellar protein FliL	Cell membrane; Chemotaxis; Flagellar rotation; Membrane; Transmembrane; Transmembrane helix.	Controls the rotational direction of flagella during chemotaxis. Belongs to the FliL family.	432	complement(1663398..1663829)
		CACC119_01936		N:COG4786	K02390	Flagellar hook protein FlgE	Bacterial flagellum.	Belongs to the flagella basal body rod proteins family.	795	complement(1664078..1664872)
		CACC119_01940		N:COG2882	K02413	Flagellar FliJ protein	Bacterial flagellum biogenesis; Bacterial flagellum protein export; Cell membrane; Chemotaxis; Membrane; Protein transport; Transport.	Flagellar protein that affects chemotactic events; Belongs to the FliJ family.	444	complement(1668488..1668931)
		CACC119_01942		N:COG1317	K02411	Probable flagellar assembly protein FliH	Bacterial flagellum biogenesis; Bacterial flagellum protein export; Protein transport; Transport.	Needed for flagellar regrowth and assembly. Belongs to the FliH family.	789	complement(1670222..1671010)
		CACC119_01943		N:COG1536	K02410	Flagellar motor switch protein FliG	Bacterial flagellum; Cell membrane; Chemotaxis; Flagellar rotation; Membrane.	One of the proteins that forms a switch complex that is proposed to be located at the base of the basal body. This complex interacts with chemotaxis proteins (such as CheY) in addition to contacting components of the motor that determine the direction of flagellar rotation. Belongs to the FliG family.	1020	complement(1671003..1672022)
		CACC119_01944		N:COG1766	K02409	Flagellar M-ring protein	Bacterial flagellum; Cell membrane; Membrane; Transmembrane; Transmembrane helix.	The M ring may be actively involved in energy transduction. Belongs to the FliF family.	1593	complement(1672034..1673626)
		CACC119_01945		N:COG1677	K02408	Flagellar hook-basal body complex protein FliE	Bacterial flagellum.	Belongs to the FliE family.	291	complement(1673676..1673966)
		CACC119_01946		N:COG1558	K02388	Flagellar basal-body rod protein FlgC	Bacterial flagellum.	Belongs to the flagella basal body rod proteins family.	450	complement(1673979..1674428)
		CACC119_01947		N:COG1815	K02387	Flagellar basal body rod protein FlgB	Bacterial flagellum.	Structural component of flagellum, the bacterial motility apparatus. Part of the rod structure of flagellar basal body; Belongs to the flagella basal body rod proteins family.	390	complement(1674431..1674820)
		CACC119_03960		T:COG0784|NT:COG0835	K03415	Chemotaxis protein CheV	Chemotaxis; Phosphoprotein.	Involved in the transmission of sensory signals from the chemoreceptors to the flagellar motors. Chemotaxis involves both a phosphorylation-dependent excitation and a methylation-dependent adaptation. CheV and CheW are involved in the coupling of the methyl-accepting chemoreceptors to the central two-component kinase Che; they are both necessary for efficient chemotaxis. Moreover, CheA-dependent …	906	3644588..3645493
		CACC119_04694		N:COG1291	K02556	Motility protein	Cell membrane; Chemotaxis; Flagellar rotation; Hydrogen ion transport; Ion transport; Membrane; Transmembrane; Transmembrane helix; Transport.	MotA and MotB comprise the stator element of the flagellar motor complex. Required for rotation of the flagellar motor. Probable transmembrane proton channel (By similarity); Belongs to the MotA family.	795	4359941..4360735
		CACC119_04695		N:COG1360	K02557	Motility protein	Cell membrane; Chemotaxis; Flagellar rotation; Membrane; Transmembrane; Transmembrane helix.	MotA and MotB comprise the stator element of the flagellar motor complex. Required for the rotation of the flagellar motor. Might be a linker that fastens the torque- generating machinery to the cell wall (By similarity); Belongs to the MotB family; Contains 1 OmpA-like domain.	834	4360728..4361561
